# Supplementary material
Source: PubMed Central journal article supplement (PMC3527075)
Supplement: NIHMS422590-supplement-supp_data.pdf [file NIHMS422590-supplement-supp_data.pdf]

**Supplementary figures and legends**

**Suppl. Figure 1**

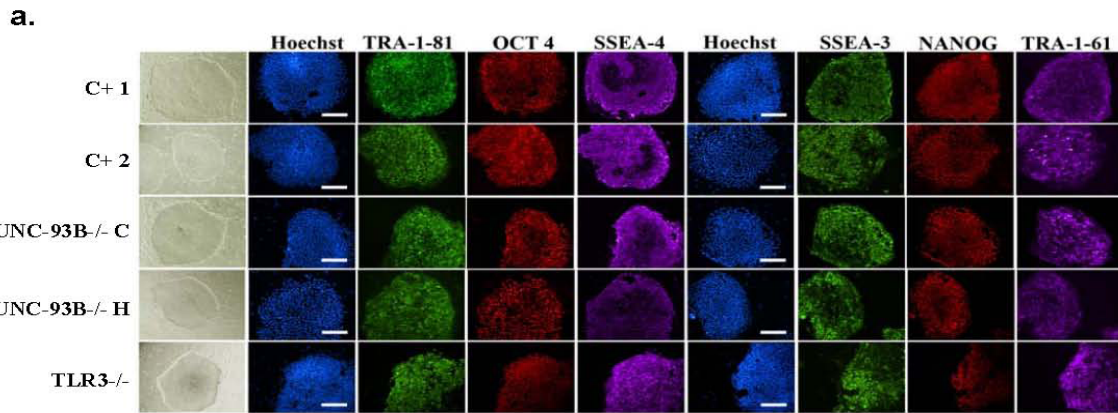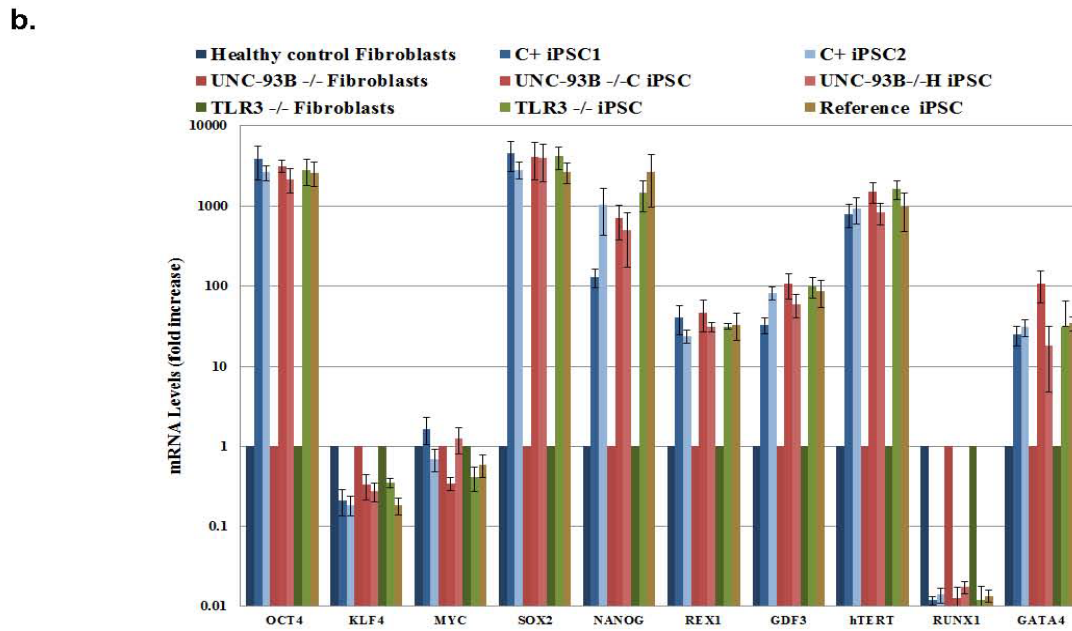



**Suppl. Figure 1. Characterization of induced pluripotent stem cells (iPSCs) derived from UNC-93B-, TLR3-deficient or healthy control fibroblasts.**

**a-** iPSCs were derived from UNC93B-deficient, TLR3-deficient and control fibroblasts as previously described<sup>13</sup>. The fibroblasts were reprogrammed by transduction with four genes encoding reprogramming factors, *OCT4*, *SOX2*, *KLF4*, and *C-MYC*, in a single polycistronic lentiviral vector<sup>14-16</sup>. Cultures were maintained under stringent conditions supporting human embryonic stem cell (hESC) growth<sup>17</sup>, and hESC-like colonies emerged five weeks later. Two iPSC lines were expanded and fully characterized for both the healthy control (C<sup>+</sup> iPSC 1 and C<sup>+</sup> iPSC 2) and the UNC-93B-deficient patient (UNC-93B<sup>-/-</sup> iPSC line C and UNC-93B<sup>-/-</sup> iPSC line H) while one line was derived from the patient with AR complete TLR3 deficiency (TLR3<sup>-/-</sup>). Each of these iPSC lines had a human embryonic stem cell (hESC)-like morphology and expressed pluripotency markers, including SSEA4, TRA-1-81, OCT4, TRA-1-60, SSEA3, and NANOG, as demonstrated by immunofluorescence analysis. Staining with 4,6-diamidino-2-phenylindole (DAPI) was used to determine the total cell content for each image. **b-** The normal, UNC93B-deficient and TLR3-deficient iPSCs had a pluripotency gene expression pattern similar to that seen in previously established control iPSCs. No statistically significant differences in the expression of *OCT4*, *KLF4*, *MYC*, *SOX2*, *NANOG*, *REX1*, *GDF3*, *hTERT*, *RUNX1* and *GATA4* were observed when comparing normal, UNC93B-deficient and TLR3-deficient iPSCs with previously established control iPSCs, as demonstrated by quantitative reverse-transcriptase PCR (qRT-PCR) ( $p > 0.05$ ). RT-qPCR results were normalized against those for the  $\beta$ -actin gene. Expression was calculated by the ddCT method, with the results expressed relative to expression levels in the individual parental fibroblast cell lines. Mean values + standard errors (SEM) were calculated from three independent experiments. Statistical analysis was performed by ANOVA test with SHAFTE/Tukey correction for multiple comparisons. In panels **a-** and **b-**, results from two control lines, one TLR3-deficient and two UNC-93B-deficient lines are shown. The data shown are representative of those obtained for the four, three and five lines tested, respectively. **c-** The patient specific iPSCs lines were found to carry the same mutation as the parental fibroblasts. Mutated alleles identical to those in the original specimens were identified by DNA sequencing, confirming the presence of the known *UNC93B1* c.1034\_1037del4 mutation, and the known TLR3 c.1660C>T and c.2236G>T mutations, in both the patients' parental fibroblasts and the derived iPSCs. The UNC-93B-deficient and control iPSCs also had an intact karyotype (data not shown). **d-** For confirmation of their pluripotency and multilineage differentiation potential, the iPSCs were allowed to differentiate *in vitro* into embryoid bodies (EB). The EB derived from iPSCs had a typical morphology, similar to that of hESC-derived EB (data not shown) and were equally able to develop into different lineages, as shown by the similar expression levels of markers of all three embryonic germ layers (ectoderm, mesoderm, and endoderm). RT-qPCR gene expression analysis for the derived EB, from control (C+), UNC-93B-deficient (UNC-93B<sup>-/-</sup>), and the TLR3-deficient (TLR3<sup>-/-</sup>) iPSCs, after 10 days, showed an increase in the expression of lineage markers for the three embryonic germ layers, including: *AFP* and *GATA4* (endoderm), *Brachyury* and *RUNX1* (mesoderm), and *NESTIN* and *NCAM* (ectoderm). Mean values  $\pm$  SEM were calculated from three independent experiments.

Suppl. Figure 2

a.

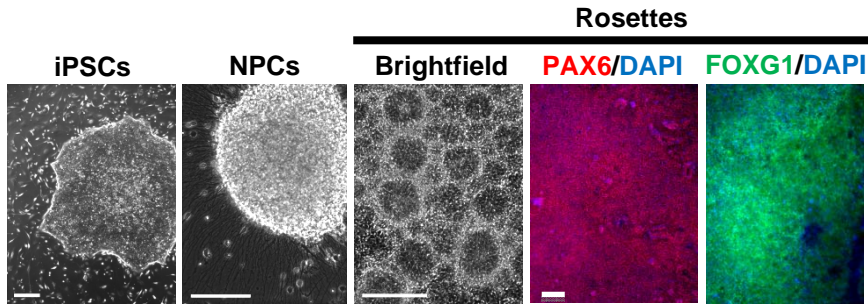

b.

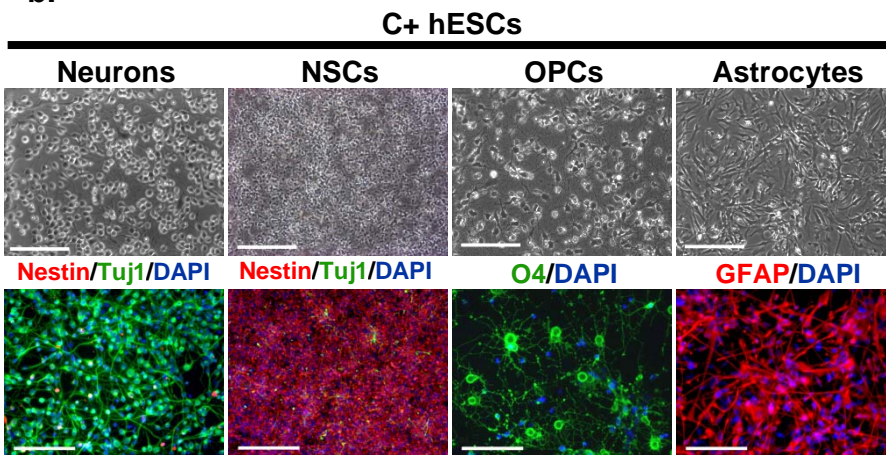

c.

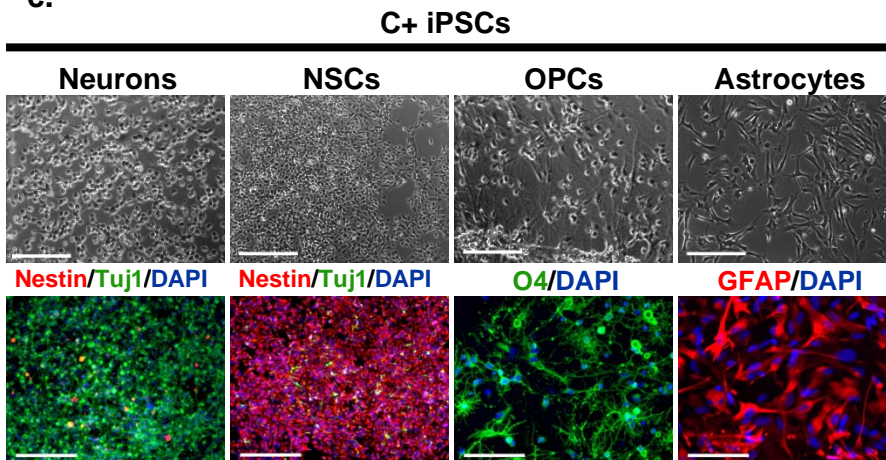

## **Suppl. Figure 2. Characterization of CNS cell types derived from hESCs and iPSCs**

**a-** Representative phase-contrast images showing the morphology of the TLR3-deficient iPSCs, neural rosettes and NPC clusters as well as immunofluorescence characterization of the rosettes cells for the forebrain marker FOXG1 and for the neuro-ectodermal marker PAX6. **b-, c-** Characterization of control hESC (**b-**)- and control iPSC (**c-**)-derived CNS cell types: Upper panels: phase-contrast images illustrating the characteristic morphologies of each neural cell type; Lower panels: Immunofluorescence analysis for markers of neural stem cells (nestin), neurons (Tuj1), oligodendrocyte progenitor cells (OPCs) (O4) and astrocytes (GFAP). Scale bars in **a-** and **b-** correspond to 100  $\mu\text{m}$ ; those in **c-** correspond to 50  $\mu\text{m}$ , except for NSCs (100  $\mu\text{m}$ ).

Suppl. Figure 3

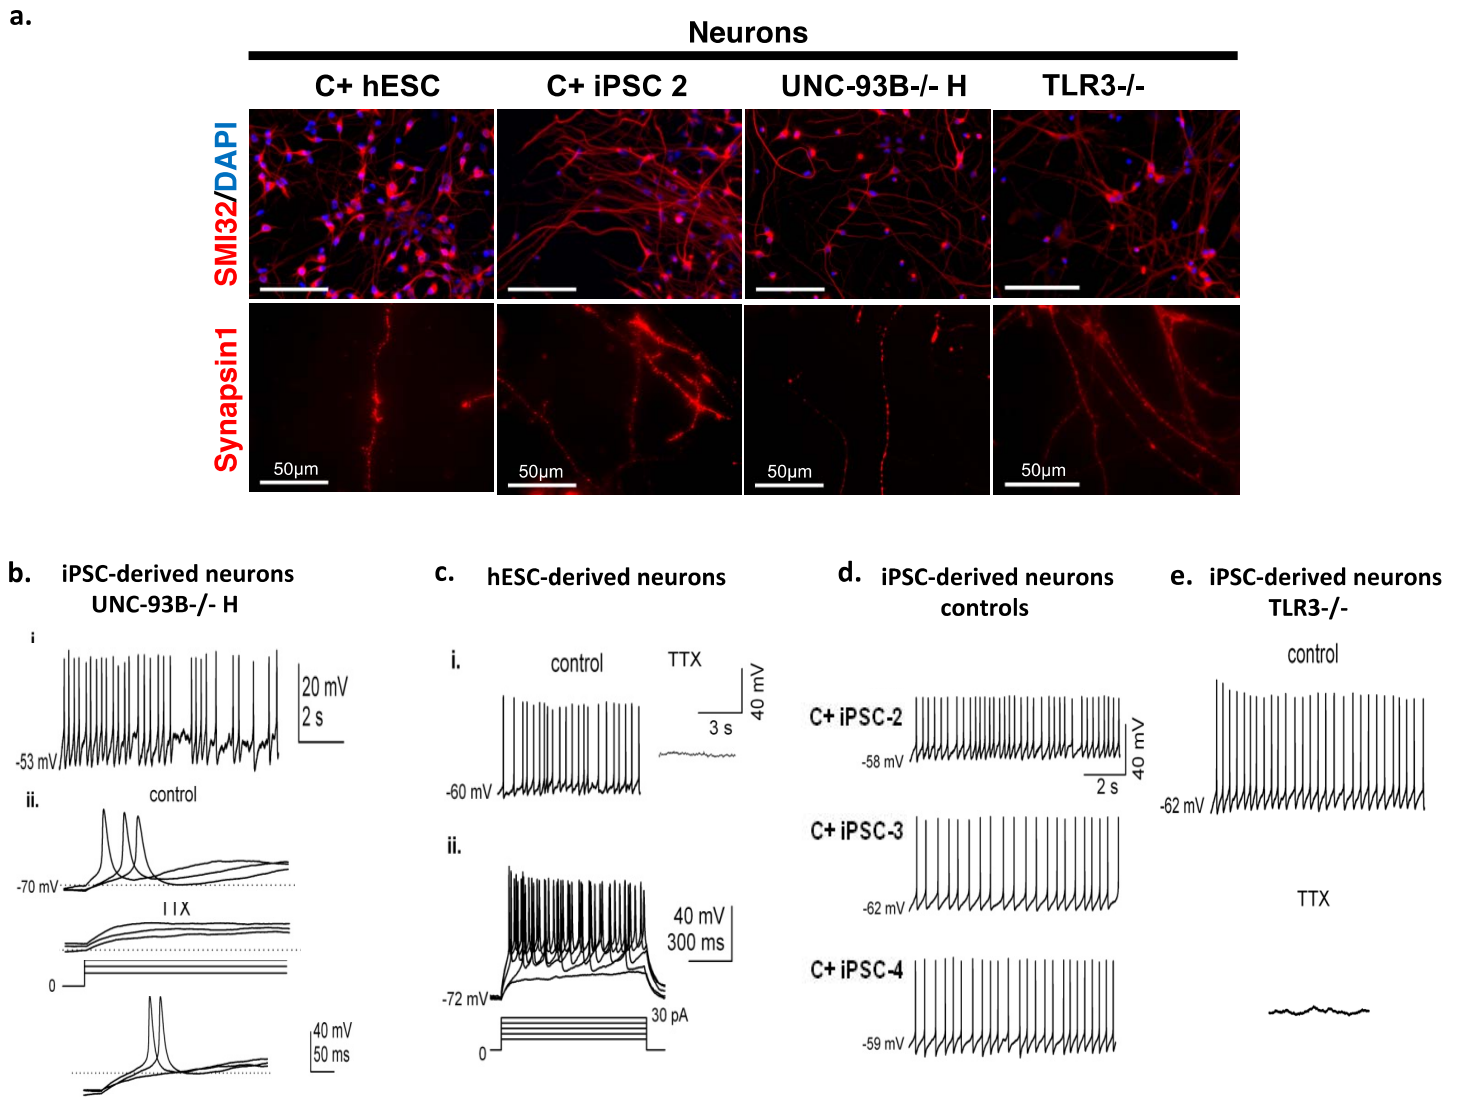

**Suppl. Figure 3. Characterization of marker expression and functional properties of neurons derived from disease and control cell lines**

**a-** Immunocytochemical analysis of the expression of a panel of neuronal markers, including SMI-32 and Synapsin-1 in neurons derived from one control hESC ( $C^+$  hESC), one control iPSC ( $C^+$  iPSC), one UNC-93B-deficient iPSC line (UNC-93B<sup>-/-</sup> H), and one TLR3-deficient iPSC line (TLR3<sup>-/-</sup>). The healthy control iPSC line ' $C^+$  iPSC 2', and the UNC-93B-deficient iPSC line 'UNC-93B<sup>-/-</sup> H' were used for differentiation of the neurons used here. **b-** Spontaneous (i) and evoked (ii) action potentials (APs) were observed in two independent UNC-93B-deficient neurons derived from one UNC-93B-deficient iPSC line (UNC-93B<sup>-/-</sup> H). For evoked APs, the current protocol is shown below (here and in **d-**). Membrane potentials are indicated to the left of each trace here and in subsequent panels. Tetrodotoxin (1  $\mu$ M) reversibly inhibited spike firing. **c-** Representative voltage traces showing spontaneous (i) and evoked (ii) APs in the same hESC-derived neuron ( $n = 12$ : RMP, range -75 to -45 mV, mean:  $-63.3 \pm 3.3$  mV,  $n = 10$ ). Tetrodotoxin (0.5  $\mu$ M) reversibly inhibited spike firing. **d-** Representative voltage traces of spontaneous AP firing in one neuron derived from each of the indicated control iPSC lines. AP firing was detected in neurons from  $C^+$  iPSC 2 ( $n = 6$ : RMP, range, -65 to -58 mV),  $C^+$  iPSC 3 ( $n = 10$ : RMP, range, -70 to -59 mV, mean:  $-64.3 \pm 1.4$  mV,  $n = 7$ ) and  $C^+$  iPSC 4 ( $n = 4$ : RMP, range -65 to -62 mV, mean:  $-63.3 \pm 0.9$  mV,  $n = 3$ ). In each case, spike firing was inhibited by TTX (0.5  $\mu$ M; data not shown). **e-** Neurons derived from TLR3-deficient iPSCs were confirmed as such on the basis of their ability to generate Na<sup>+</sup>-dependent action potentials ( $n = 13$ : RMP, range -72 to -52 mV, mean:  $-60.3 \pm 2.4$ ,  $n = 9$ ). Membrane potential is indicated to the left of the panel. Representative voltage traces for spontaneous AP firing. Spike firing was inhibited by TTX (0.5  $\mu$ M).

Suppl. Figure 4

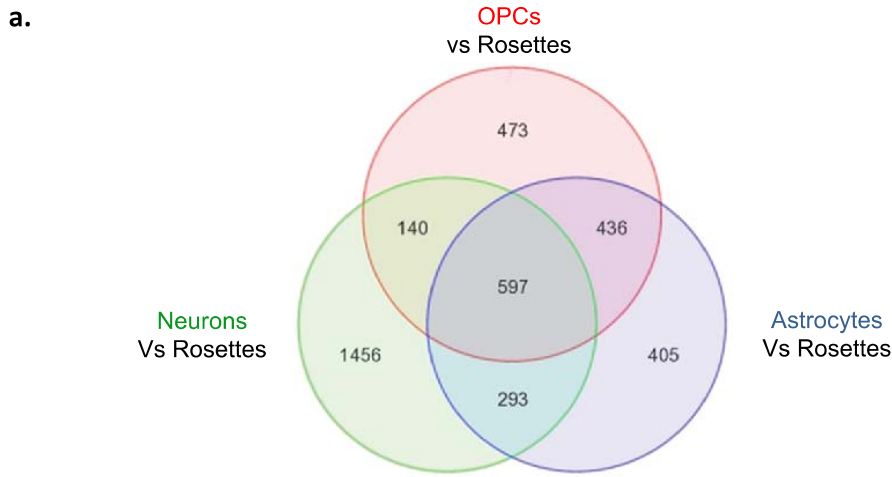

**b.**      **Unbias Top genes only in OPCs**

|         |       |
|---------|-------|
| OLIG1   | 101.5 |
| OLIG2   | 100.3 |
| APOD    | 30.5  |
| FAM107A | 28.5  |
| NKX6-2  | 17.3  |
| SCG2    | 16.7  |
| ANGPTL2 | 15.9  |
| FAM5C   | 14.3  |
| S100A16 | 14.3  |
| FBXO32  | 13.2  |
| IFIT2   | 13.1  |
| LRRC38  | 11.5  |
| NCAM2   | 11.4  |
| NKX2-2  | 11.1  |
| <hr/>   |       |
| PLP1    | 7.0   |
| SOX10   | 5.4   |
| PLLP    | 5.3   |
| MAG     | 4.0   |
| MBP     | 2.5   |

**Unbias Top genes only in Astrocytes**

|           |      |
|-----------|------|
| A2M       | 56.9 |
| GFAP      | 40.5 |
| CD44      | 29.2 |
| CAPN5     | 24.5 |
| C1QL1     | 22.7 |
| SYNM      | 13.0 |
| HS.204481 | 10.7 |
| MAN1C1    | 10.6 |
| IFI16     | 10.5 |
| GAD1      | 10.0 |
| PLCH2     | 10.0 |
| SLC47A2   | 10.0 |
| RASD1     | 8.9  |
| CFI       | 8.8  |
| C21ORF62  | 8.1  |
| CDKN1A    | 8.1  |
| SIK1      | 7.0  |
| HS3ST3A1  | 6.6  |
| ZNF436    | 6.3  |

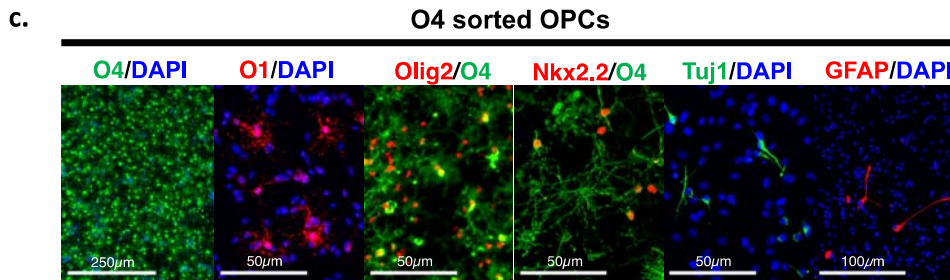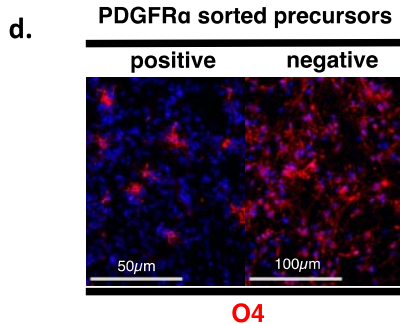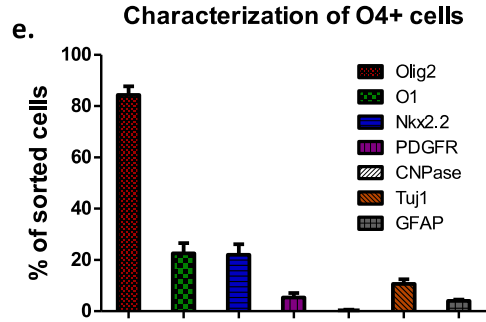



#### **Suppl. Figure 4. Characterization of astrocyte and OPC lineage populations**

**a-** Venn diagram showing a comparison of the genes differentially expressed in microarray analysis of gene expression. RNA was extracted with Trizol reagent (Invitrogen) from purified hESC-derived astrocytes, OPCs, neurons and rosettes, processed by the MSKCC Genomic core facility and hybridized with Illumina human HT-12 oligonucleotide arrays. Gene expression analysis was performed with the Partek Genomics Suite: after quantile normalization, differentially expressed genes were defined for each population (neurons, astrocytes and OPCs, as compared to purified rosettes ( $p$ -value  $\leq 0.05$ )). **b-** List of the top 14 genes (upper panel) showing the greatest degree of enrichment and selective expression in OPCs compared to neural rosettes (of 473 genes considered; see **a-**). Additional selected genes for which enrichment was detected in oligodendrocyte progenitor cells (OPCs) are shown below. And list of the top 19 genes (lower panel) with the highest degree of enrichment and displaying selective expression in astrocytes compared to neural rosettes (of 405 genes considered; see **a-**). **c-** Immunocytochemical analysis of the expression of oligodendrocyte lineage markers O4, O1, Olig2 and Nkx2.2, and of markers of neurons (TUJ1) and astrocytes (GFAP) in O4-sorted OPC cultures (three months of differentiation from the hESC stage). **d-** Quantification of marker co-expression in the O4<sup>+</sup> cells used in this study. **e-** Immunocytochemical analysis of three-month-old cells two days after PDGFR $\alpha$  sorting. PDGFR<sup>+</sup> cell populations contained fewer O4<sup>+</sup> OPCs than PDGFR-negative cells.

Suppl. Figure 5

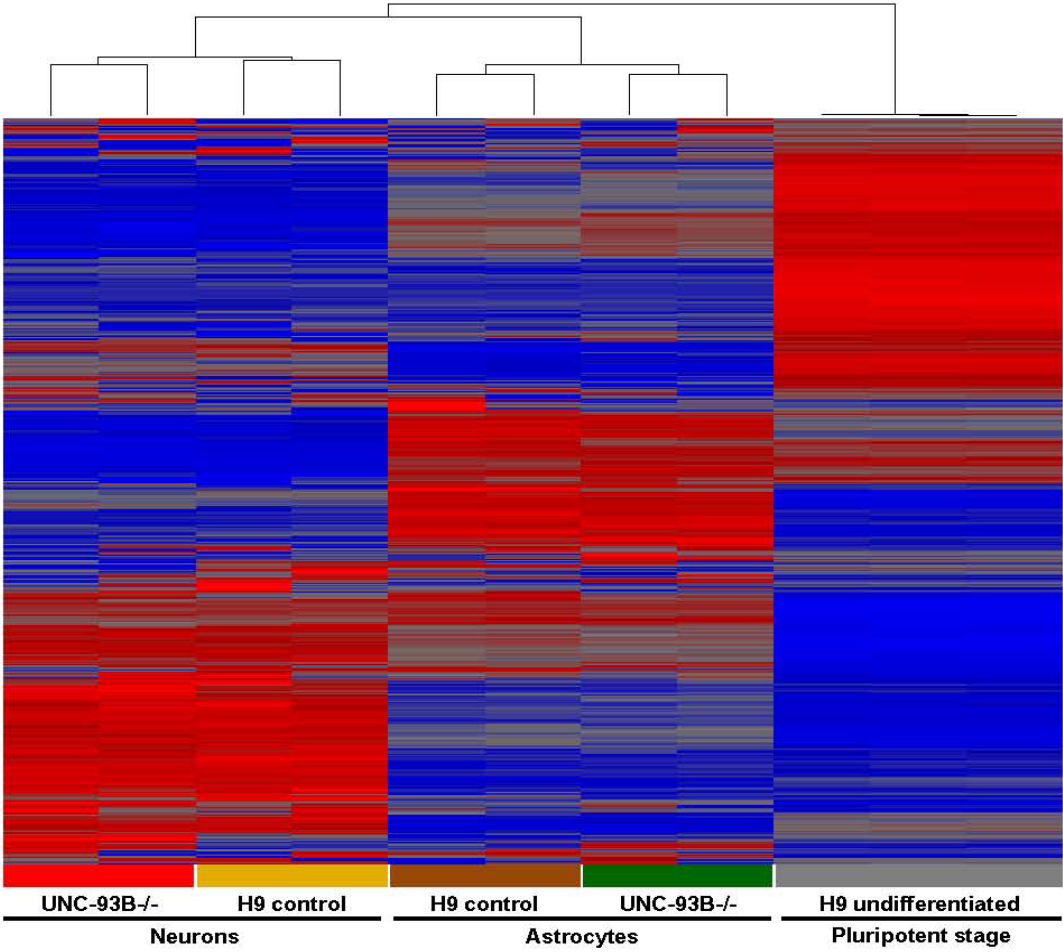

**Suppl. Figure 5. UNC-93B deficiency does not affect global gene expression profile in neurons and astrocytes, as shown by comparison with control cells differentiated from hESCs**

Clustering based on all the genes displaying significant differential expression with respect to hESCs. The gene expression profile in astrocytes and neurons differentiated from UNC-93B-deficient iPSCs line C (UNC-93B<sup>-/-</sup>) or control hESCs line H9 (H9) and that of control hESCs are shown. UNC-93B-deficiency did not significantly alter the overall pattern of gene expression in neurons and astrocytes derived from UNC-93B-deficient iPSCs, as shown by comparison with hESC-derived cells. Results for biological duplicates (for neurons and astrocytes) or triplicates (for undifferentiated H9 hESCs) are shown.

Suppl. Figure 6

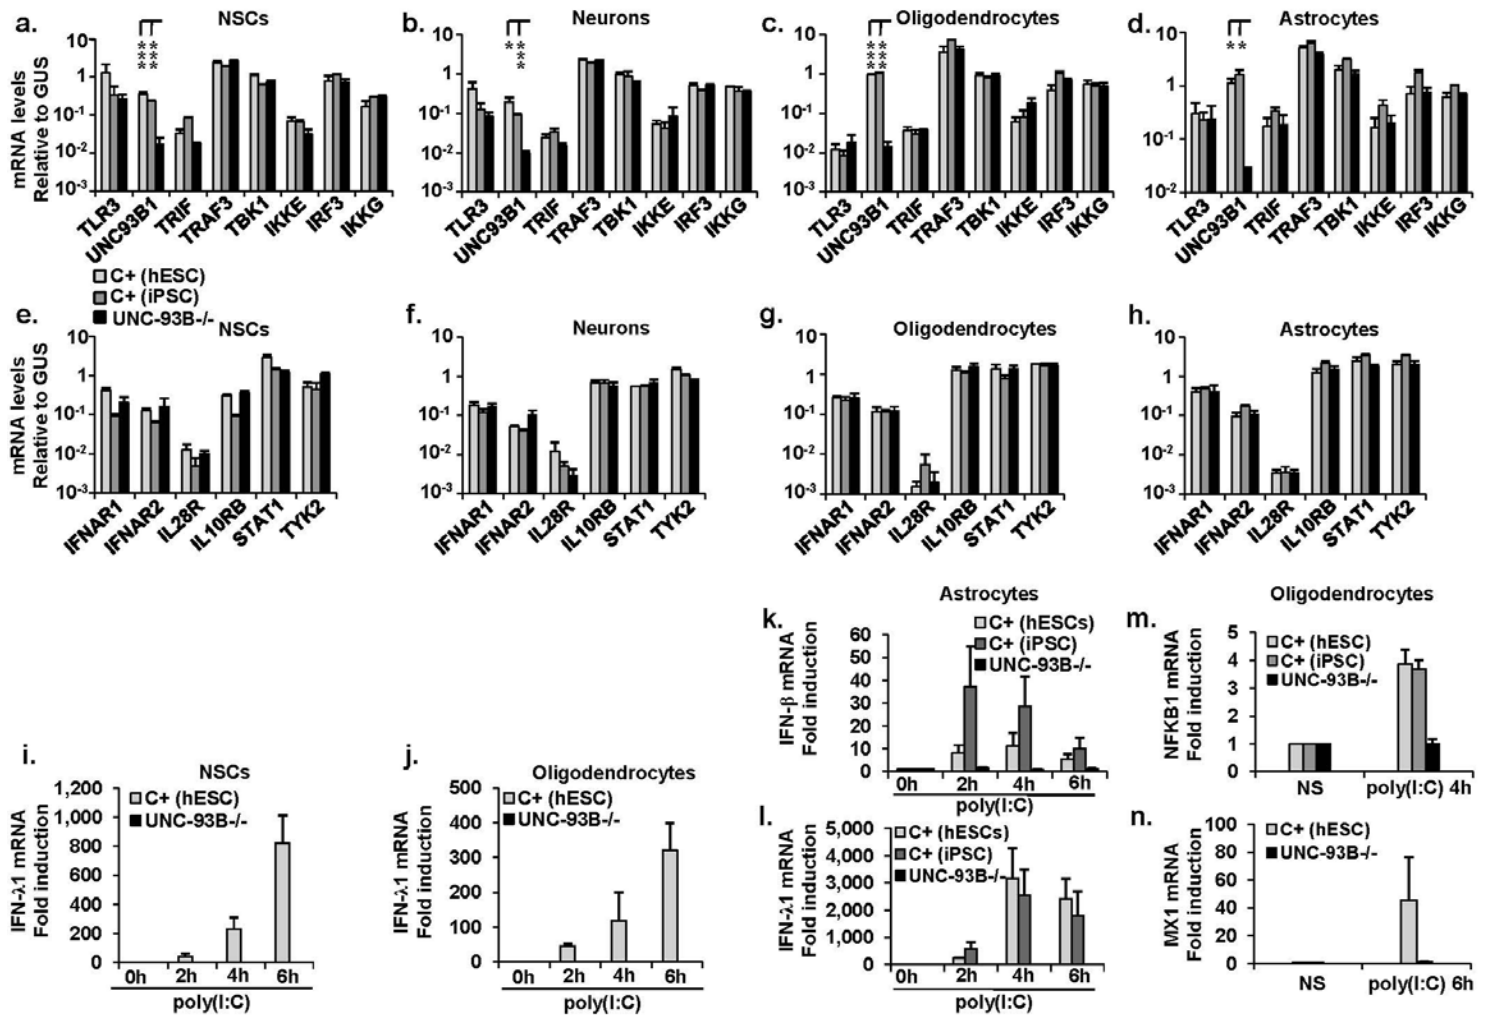

## Suppl. Figure 6. UNC-93B-dependent IFN responses to TLR3 in neurons and glial cells

**a- to h-** mRNA levels for TLR3 (**a- to d-**) and IFN (**e- to h-**) pathway genes, in neural stem cells (NSCs) (**a-, e-**), neurons (**b-, f-**), oligodendrocytes (**c-, g-**) and astrocytes (**d-, h-**) differentiated from hESCs from a healthy control ( $C^+$  (hESC), light gray columns), from iPSCs from a healthy control ( $C^+$  (iPSCs), dark gray columns), and from a UNC-93B-deficient patient (UNC-93B<sup>-/-</sup>). Mean values  $\pm$  SEM were calculated from two independent experiments, each carried out in duplicate. ANOVA was performed for data shown in **a- to h-**. When significant, Dunnett *t* tests were performed for 2X2 comparisons, and significant results are indicated in corresponding panels (\*  $p < 0.05$ , \*\*\*  $p < 0.001$ ). **i-** IFN- $\lambda$ 1 mRNA induction, after 2, 4 or 6 hours of poly(I:C) stimulation, in NSCs differentiated from UNC-93B-deficient iPSCs (UNC-93B<sup>-/-</sup>) or from hESCs from a healthy control ( $C^+$ (hESC)). **j-** IFN- $\lambda$ 1 mRNA induction, after 2, 4 or 6 hours of stimulation with poly(I:C), in oligodendrocytes differentiated from UNC-93B-deficient iPSCs (UNC-93B<sup>-/-</sup>), or from hESCs from a healthy control ( $C^+$ (hESC)). **k- and l-** IFN- $\beta$  (**k-**) or IFN- $\lambda$ 1 (**l-**) mRNA induction, after 2, 4 or 6 hours of stimulation with poly(I:C), in astrocytes differentiated from UNC-93B-deficient iPSCs (UNC-93B<sup>-/-</sup>), from iPSCs from two healthy controls, or from hESCs from a healthy control ( $C^+$ (hESC)). **m-** NFKB1 mRNA induction, after 4 hours of stimulation with poly(I:C), in oligodendrocytes differentiated from UNC-93B-deficient iPSCs (UNC-93B<sup>-/-</sup>), from hESCs from a healthy control ( $C^+$ (hESC)), or from iPSCs from a healthy control ( $C^+$  (iPSC)). **n-** MX1 mRNA induction, after 6 hours of stimulation with poly(I:C), in oligodendrocytes differentiated from UNC-93B-deficient iPSCs (UNC-93B<sup>-/-</sup>), or from hESCs from a healthy control ( $C^+$ (hESC)). For the data shown in **i-** to **n-**, mean values  $\pm$  SEM were calculated from two independent experiments, each carried out in duplicate. Student's *t* tests showed a significant induction of IFN- $\beta$ , IFN- $\lambda$ 1, NFKB1 or MX1 in all cells from all the controls tested ( $p < 0.05$ ), but not in UNC-93B-deficient cells. One healthy control line ' $C^+$  iPSC 3' was used in **a-, d-, e-** and **h-**. One healthy control line ( $C^+$  iPSC 2) is used in **b-, d-, f-, g-** and **m-**. Two healthy controls lines ( $C^+$ iPSC 3 and  $C^+$  iPSC 4) were used in **k- and l-**. Mean values  $\pm$  SEM calculated from the two iPSC controls are presented. The UNC-93B-deficient iPSC line 'UNC-93B<sup>-/-</sup> C' was used in experiments **a-** through **n-**.

Suppl. Figure 7

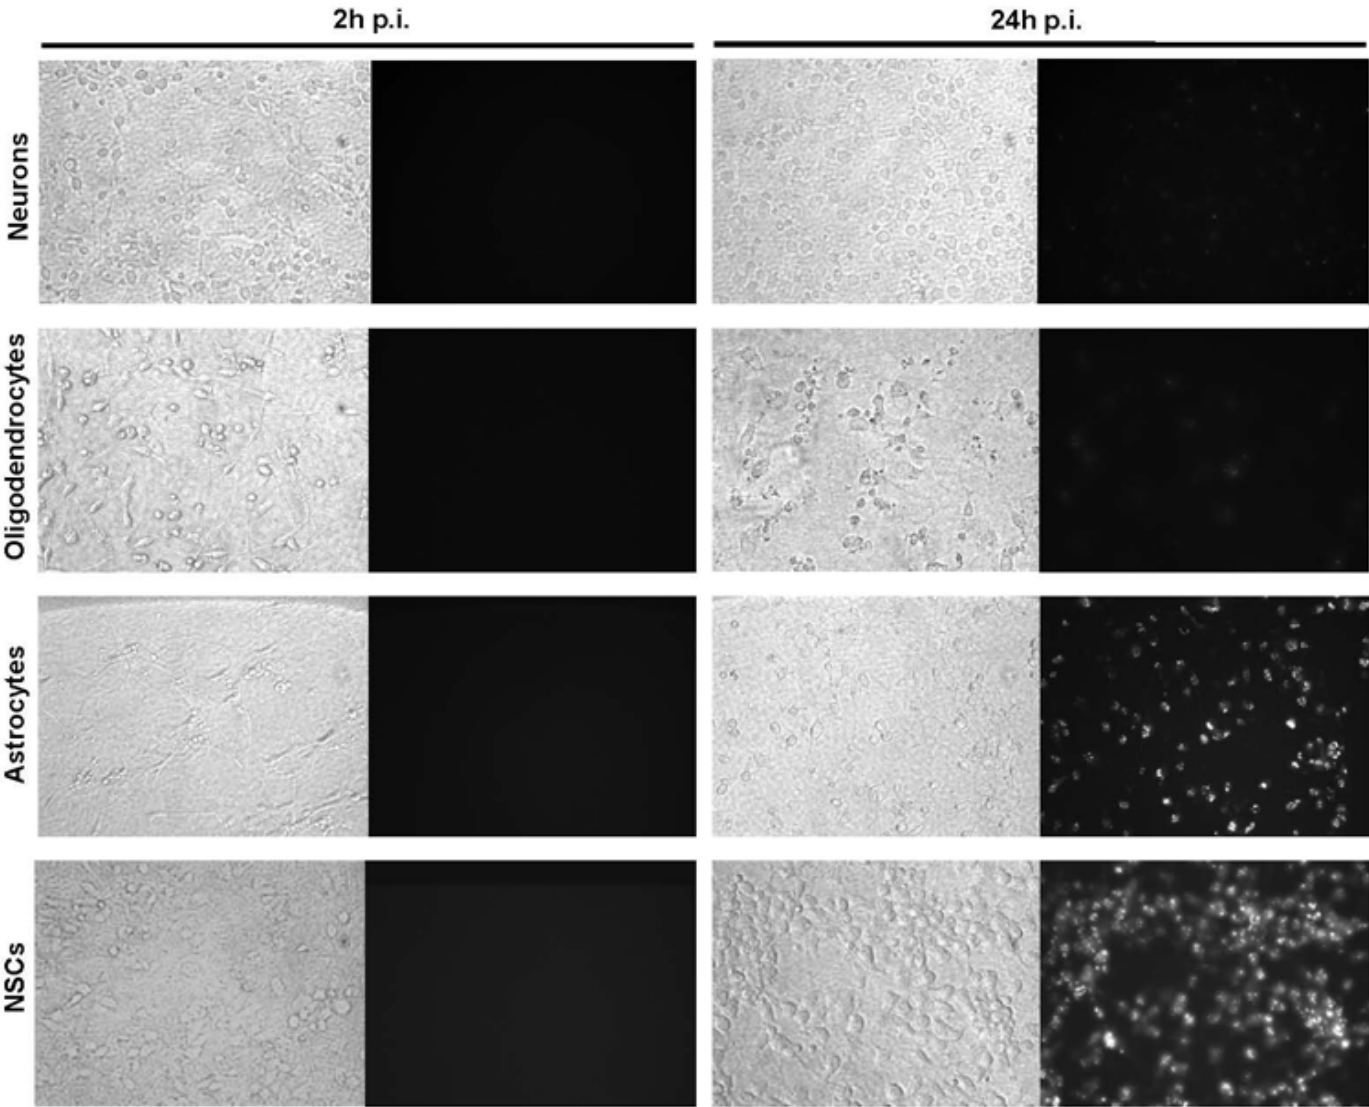

### **Suppl. Figure 7. HSV-1-GFP infection in central nervous system cells**

Representative images showing GFP expression in HSV-1-GFP infected healthy control central nervous system (CNS) cells. After 2 or 24 hours of infection with HSV-1-GFP at a MOI of 1, GFP expression in neurons, oligodendrocytes, astrocytes and NSCs differentiated from hESCs from a healthy control was visualized under a fluorescence microscope and shown. Phase-contrast photomicrographs of the NSCs, neurons, oligodendrocytes and astrocytes from the same field are also shown.

Suppl. Figure 8

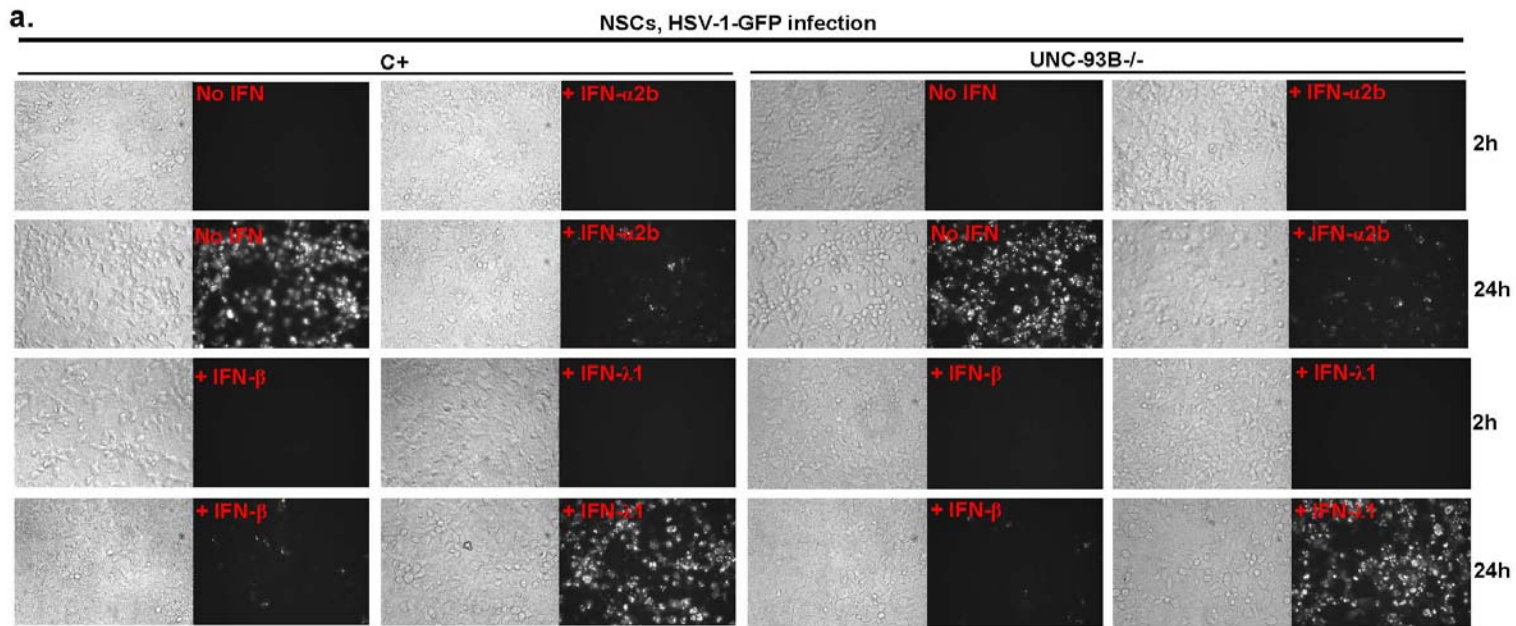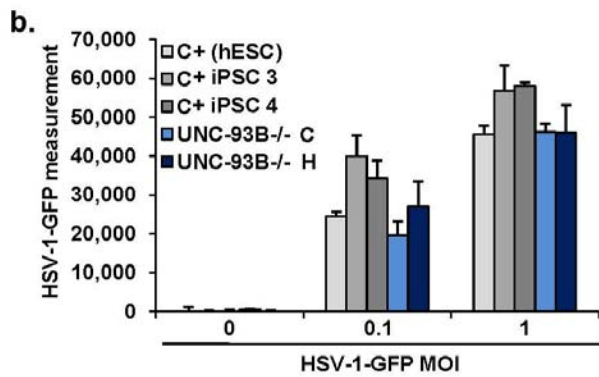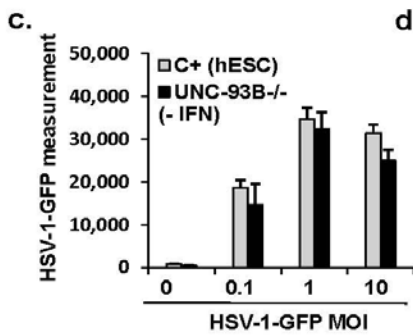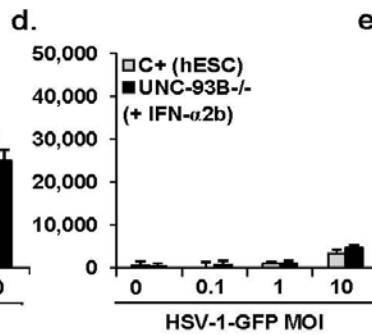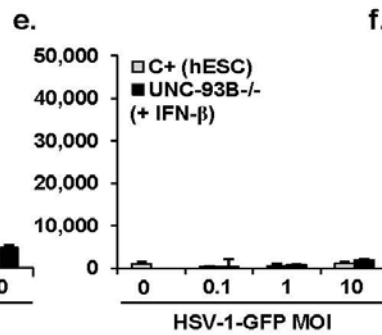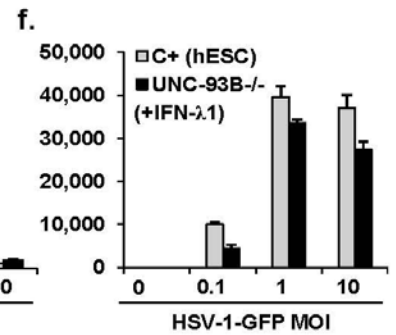



### Suppl. Figure 8. HSV-1-GFP infection in UNC-93B-deficient and control NSCs

**a-** Representative images showing GFP expression in HSV-1-GFP infected NSCs from healthy controls or UNC-93B-deficient patient. After 2 and 24 hours of infection with HSV-1-GFP at a MOI of 1, GFP expression in NSCs differentiated from hESCs from a healthy control ( $C^+$ ) (left panel) or from UNC-93B-deficient (UNC-93B<sup>-/-</sup>) iPSCs (right panel), with or without IFN- $\alpha$ 2b, IFN- $\beta$  or IFN- $\lambda$ 1 treatment, was visualized by fluorescence microscopy. Phase-contrast photomicrographs of the NSCs from the same field are also shown. The UNC-93B-deficient iPSC line 'UNC-93B<sup>-/-</sup> C' was used here for NSC differentiation for this experiment. **b-** After 24 hours of infection with various MOI of HSV-1-GFP, the GFP expression in NSCs differentiated from two lines of UNC-93B-deficient iPSCs (UNC-93B<sup>-/-</sup> C, UNC-93B<sup>-/-</sup> H), from iPSCs from two healthy controls, one line each ( $C^+$  iPSC 3,  $C^+$  iPSC 4), or from hESCs from a healthy control ( $C^+$  (hESC)), without IFN treatment, was assessed with a fluorescence plate reader. The difference in GFP fluorescence intensity between HSV-1-GFP-infected cells and uninfected cells is shown. ANOVA and subsequent Dunnett *t* tests showed that GFP levels in UNC-93B-deficient NSCs were not significantly higher than those of the healthy controls tested. **c-, d-, e-, f-** After 24 hours of infection with various MOI of HSV-1-GFP, the GFP expression in NSCs differentiated from UNC-93B-deficient iPSCs, or from hESCs from a healthy control, without IFN treatment (**c-**) or upon treatment with IFN- $\alpha$ 2b (**d-**), IFN- $\beta$  (**e-**) or IFN- $\lambda$ 1 (**f-**), was assessed with a fluorescence plate reader. The difference in GFP fluorescence intensity between HSV-1-GFP-infected cells and uninfected cells is shown. In **c-** to **f-**, the UNC-93B-deficient iPSC line 'UNC-93B<sup>-/-</sup> C' was used for NSC differentiation. For the data shown in **b-**, mean values  $\pm$  SEM were calculated from a single experiment, carried out in triplicate. For the data shown in **c-, d-, e-** and **f-**, mean values  $\pm$  SEM were calculated from two independent experiments, each carried out in triplicate.

Suppl. Figure 9

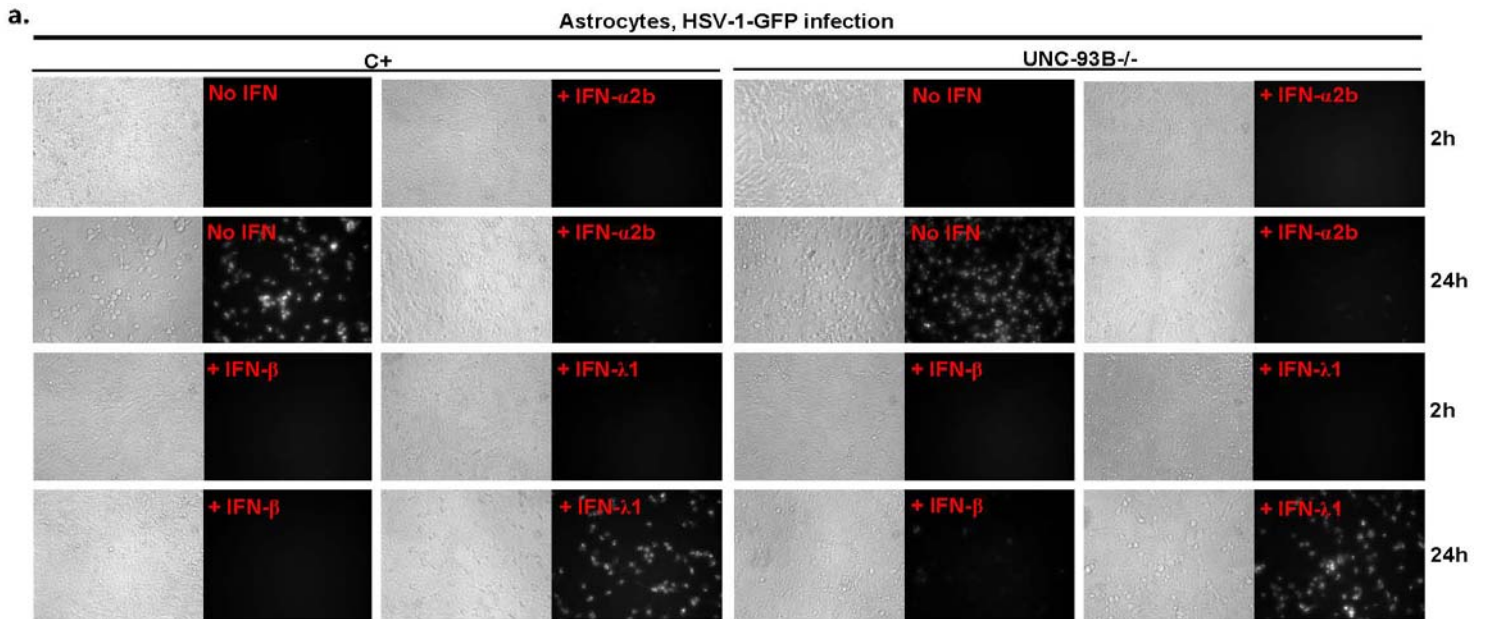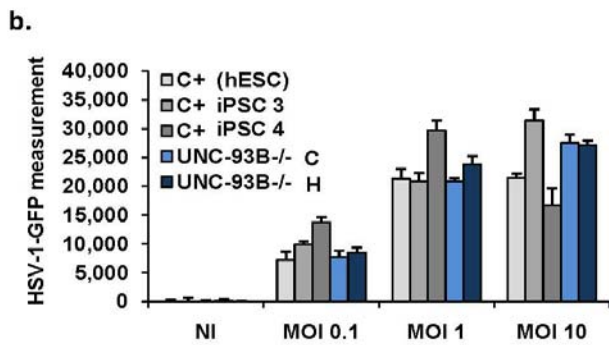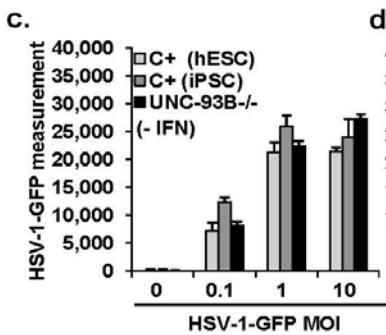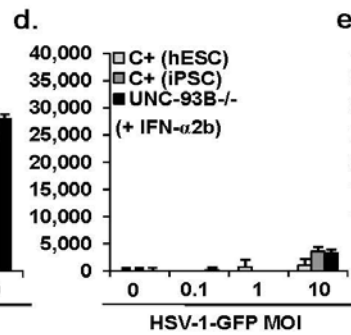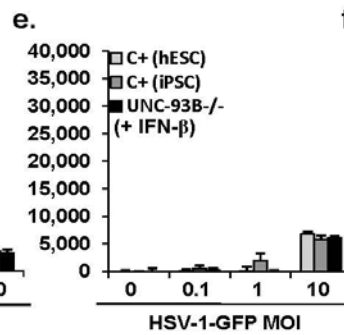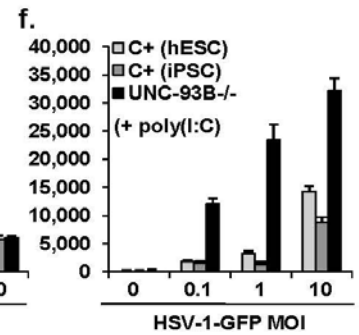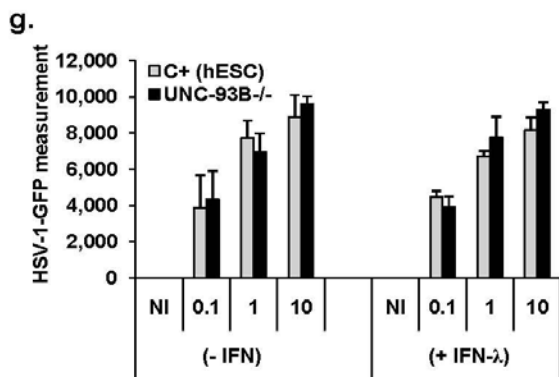

### Suppl. Figure 9. HSV-1-GFP infection in UNC-93B-deficient and control astrocytes

**a-** Representative images showing GFP expression in HSV-1-GFP infected astrocytes from healthy controls or UNC-93B-deficient patient. After 2 and 24 hours of infection with HSV-1-GFP at a MOI of 1, GFP expression in astrocytes differentiated from hESCs from a healthy control ( $C^+$ ) (left panel) or from UNC-93B-deficient iPSCs ( $UNC-93B^{-/-}$ ) (right panel), with or without IFN- $\alpha$ 2b, IFN- $\beta$  or IFN- $\lambda$ 1 treatment, was visualized by fluorescence microscopy. Phase-contrast photomicrographs of the astrocytes from the same field are also shown. The UNC-93B-deficient iPSC line 'UNC-93B $^{-/-}$  C' was used for the differentiation of astrocytes for this experiment. **b-** After 24 hours of infection with various MOI of HSV-1-GFP, GFP expression in astrocytes differentiated from two lines of UNC-93B-deficient iPSCs ( $UNC-93B^{-/-}$  C,  $UNC-93B^{-/-}$  H), iPSCs from two healthy controls, one line each ( $C^+$  iPSC 3,  $C^+$  iPSC 4), or from hESCs from a healthy control ( $C^+$  (hESC)), without IFN treatment, was assessed with a fluorescence plate reader. The difference in GFP fluorescence intensity between HSV-1-GFP-infected cells and uninfected cells is shown. ANOVA and subsequent Dunnett  $t$  tests showed GFP levels in UNC-93B-deficient astrocytes were not significantly higher than those of the healthy controls tested. **c-, d-, e- and f-** After 24 hours of infection with various MOI of HSV-1-GFP, GFP expression in astrocytes differentiated from UNC-93B-deficient iPSCs ( $UNC-93B^{-/-}$ ), from iPSCs from two healthy controls, one line each ( $C^+$  iPSC 3,  $C^+$  iPSC 4), or from hESCs from a healthy control ( $C^+$  (hESC)) ,without any treatment (**c-**), or upon treatment with IFN- $\alpha$ 2b (**d-**), IFN- $\beta$  (**e-**) or poly(I:C) (**f-**), was measured with a fluorescence plate reader. The difference in GFP fluorescence intensity between HSV-1-GFP-infected cells and uninfected cells is shown. **g-** After 24 hours of infection with various MOI of HSV-1-GFP, GFP expression in astrocytes differentiated from UNC-93B-deficient iPSCs, or from hESCs from a healthy control, without IFN treatment (left panel), or upon treatment with IFN- $\lambda$ 1 (right panel), was measured with a fluorescence plate reader. The difference in GFP fluorescence intensity between HSV-1-GFP-infected cells and uninfected cells is shown. In **c-** to **g-**, the UNC-93B-deficient iPSC line 'UNC-93B $^{-/-}$  C' was used for the differentiation of astrocytes. For the data shown in **b-** to **g-**, mean values  $\pm$  SEM were calculated from two independent experiments, each carried out in triplicate.

Suppl. Figure 10

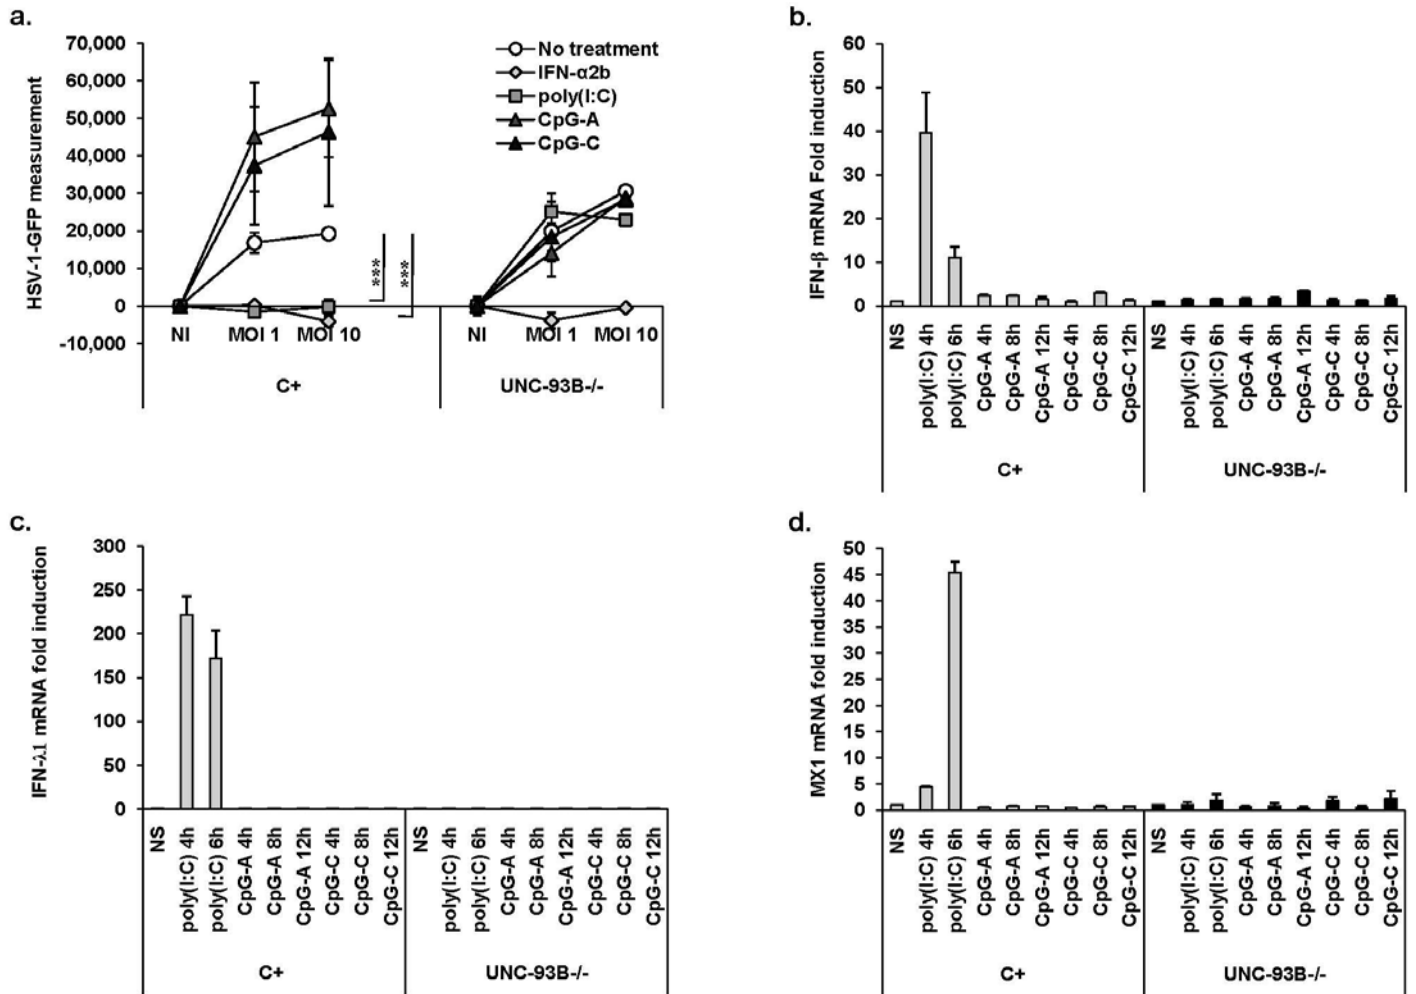

**Suppl. Figure 10. Protective effect of poly(I:C) treatment against HSV-1-GFP infection in control but not UNC-93B-deficient astrocytes**

**a-** After 24 hours of infection with various MOI of HSV-1-GFP, GFP expression in astrocytes differentiated from UNC-93B-deficient iPSCs (UNC-93B<sup>-/-</sup>) or from hESCs from a healthy control (C<sup>+</sup>), without IFN treatment, treated with IFN- $\alpha$ 2b, poly(I:C), CpG-A or CpG-C, was measured with a fluorescence plate reader. The difference in GFP fluorescence intensity between HSV-1-GFP-infected cells and uninfected cells is shown. Mean values  $\pm$  SEM were calculated from two independent experiments, each carried out in triplicate. ANOVA was performed for data shown in **a-**, from UNC-93B<sup>-/-</sup> or from C<sup>+</sup> astrocytes, without IFN treatment, treated with IFN- $\alpha$ 2b or poly(I:C). When significant, Dunnett *t* tests were performed for 2X2 comparisons, and significant results are indicated in corresponding panels (\*\*\*)  $p < 0.001$ ). **b-**, **c-** and **d-** IFN- $\beta$  (**b-**), IFN- $\lambda$ 1 (**c-**) or MX1 (**d-**) mRNA induction, after 4 or 6 hours of poly(I:C) stimulation, or 4, 8 or 12 hours of CpG-A or CpG-C stimulation, in astrocytes differentiated from UNC-93B-deficient iPSCs (UNC-93B<sup>-/-</sup>) or from hESCs from a healthy control (C<sup>+</sup>). Mean values  $\pm$  SEM were calculated from two independent experiments, each carried out in duplicate. In **a-** to **d-**, the UNC-93B-deficient iPSC line 'UNC-93B<sup>-/-</sup>C' was used for the differentiation of astrocytes. Student's *t* tests showed that IFN- $\beta$ , IFN- $\lambda$ 1 and MX1 were all significantly induced after poly(I:C) stimulations, in the C<sup>+</sup> cells tested ( $p < 0.001$ ), but not in UNC-93B-deficient cells.

Suppl. Figure 11

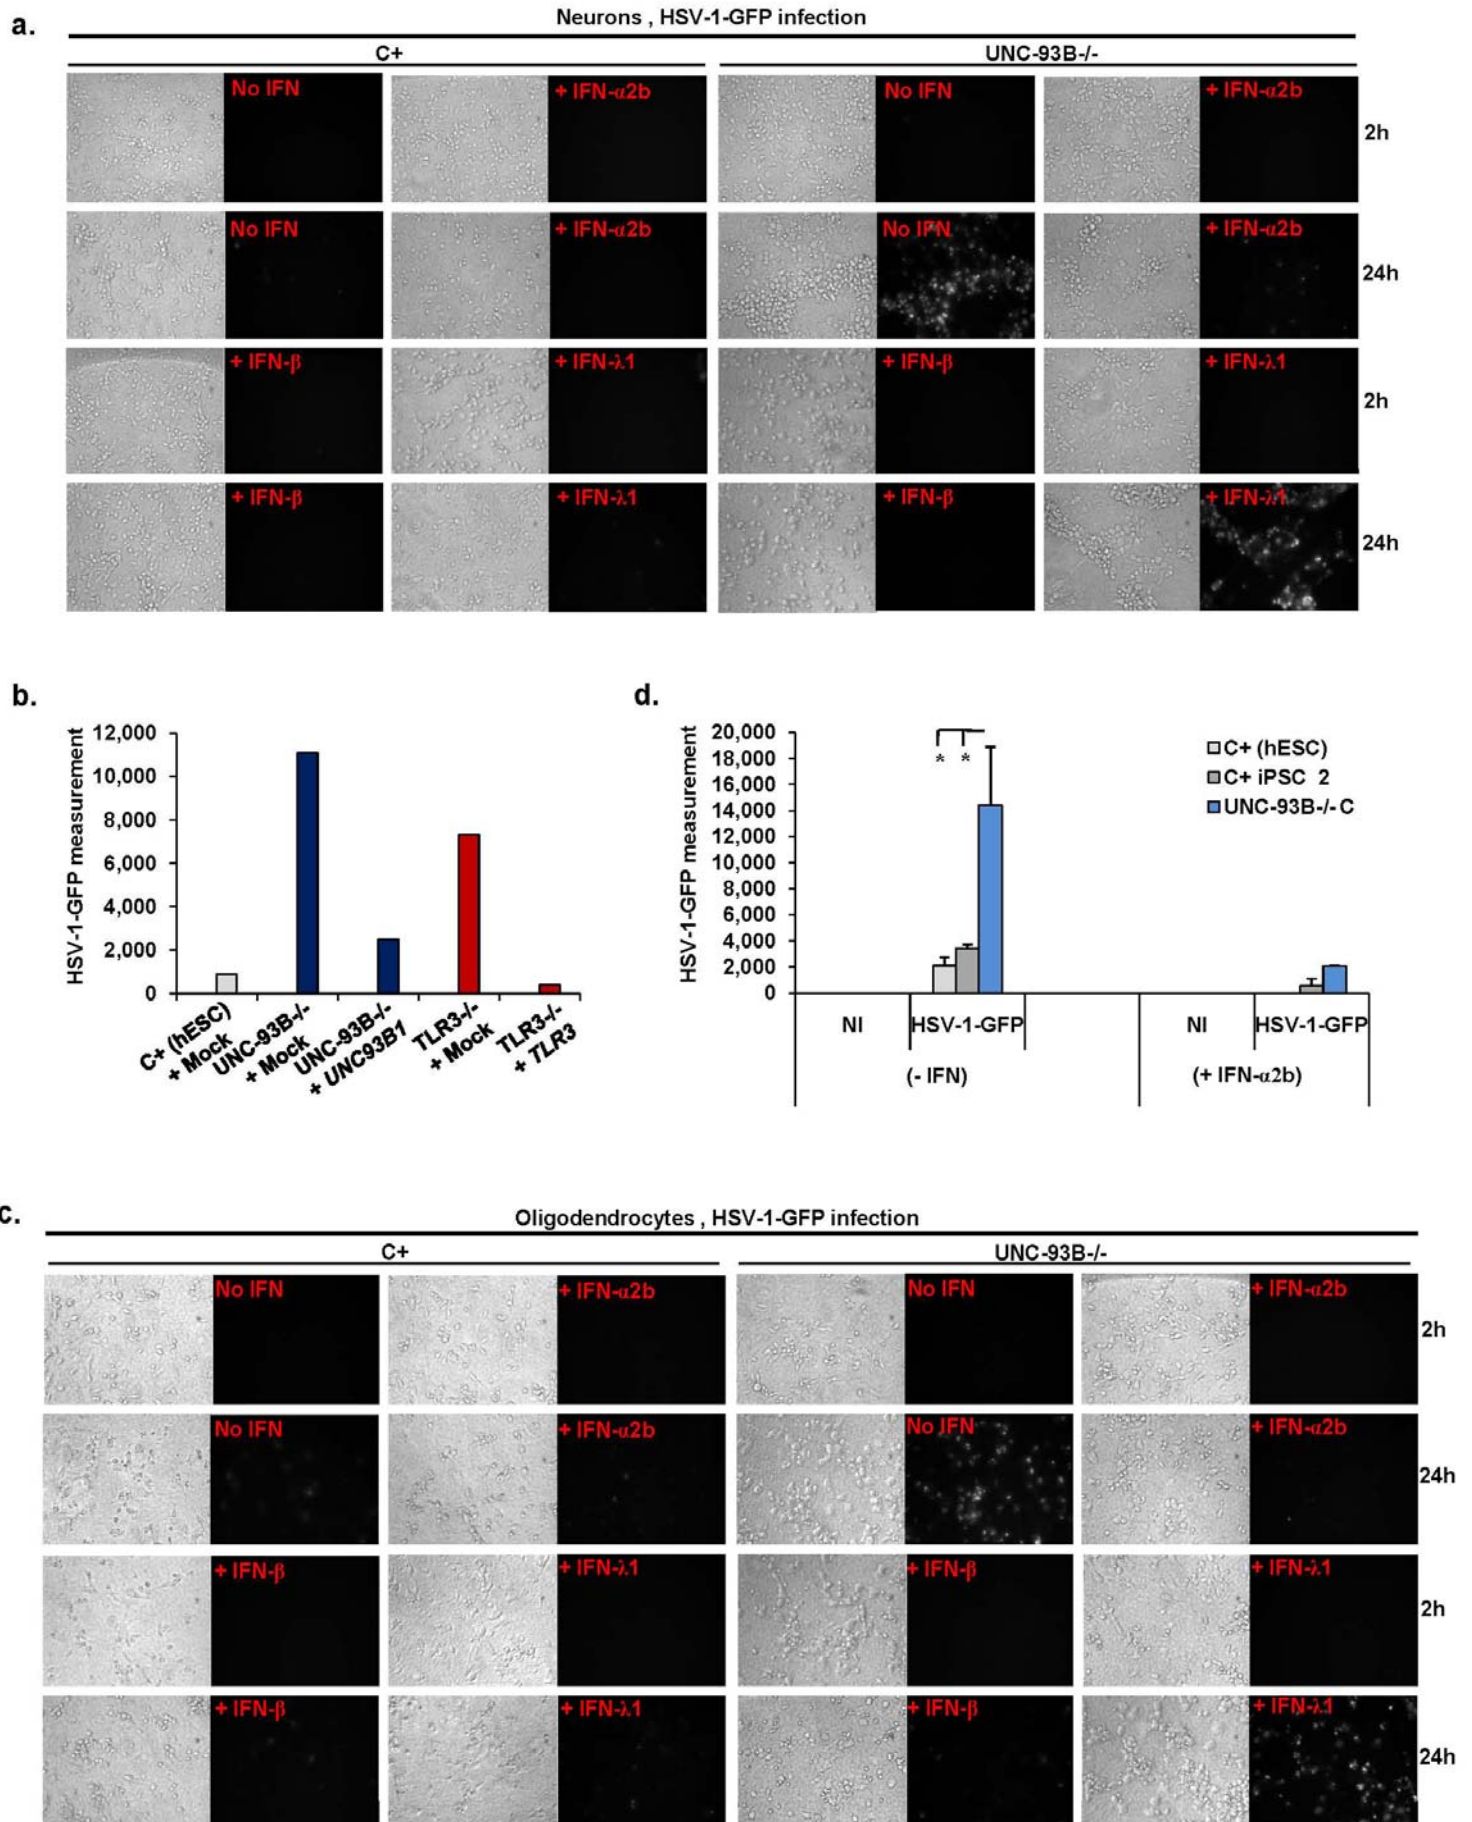

## Suppl. Figure 11. UNC-93B- or TLR3-deficient neurons and oligodendrocytes are susceptible to HSV-1 infection

**a-** Representative images showing GFP expression in HSV-1-GFP infected neurons from healthy controls or UNC-93B-deficient patient. After 2 and 24 hours of infection with HSV-1-GFP at a MOI of 1, GFP expression in neurons differentiated from hESCs from a healthy control ( $C^+$ ) (left panel), from UNC-93B-deficient iPSCs (UNC-93B<sup>-/-</sup>) (right panel), with or without IFN- $\alpha$ 2b, IFN- $\beta$  or IFN- $\lambda$ 1 treatment was visualized by fluorescence microscopy. Phase-contrast photomicrographs of the neurons from the same field are also shown. The UNC-93B-deficient iPSC line ‘UNC-93B<sup>-/-</sup> C’ was used for the differentiation of neurons for this experiment. **b-** After 2 and 24 hours of infection with HSV-1-GFP at a MOI of 1, GFP expression was assessed with a fluorescence plate reader, in UNC-93B-deficient neurons (differentiated from UNC-93B<sup>-/-</sup> iPSC line H), after infection with a lentivirus containing human WT *UNC93B1* (UNC-93B<sup>-/-</sup> + *UNC93B1*) or a mock construct (UNC-93B<sup>-/-</sup> + Mock); in TLR3-deficient neurons, after infection with a lentivirus containing human WT *TLR3* (TLR3<sup>-/-</sup> + *TLR3*) or a mock construct (TLR3<sup>-/-</sup> + Mock); and neurons differentiated from one healthy control hESC line, after infection with a lentivirus containing a mock construct ( $C^+$  (hESC) + Mock). The difference in GFP fluorescence intensity between HSV-1-GFP-infected cells and uninfected cells is shown. **c-** Representative images showing GFP expression in HSV-1-GFP infected oligodendrocytes from healthy controls or UNC-93B-deficient patient. After 2 or 24 hours of infection with HSV-1-GFP at a MOI of 1, GFP expression in oligodendrocytes differentiated from hESCs from a healthy control ( $C^+$ ) (left panel), from UNC-93B-deficient iPSCs (UNC-93B<sup>-/-</sup>) (right panel), with or without IFN- $\alpha$ 2b, IFN- $\beta$  or IFN- $\lambda$ 1 treatment, was visualized by fluorescence microscopy. Phase-contrast photomicrographs of the oligodendrocytes from the same field are also shown. The UNC-93B-deficient iPSC line ‘UNC-93B<sup>-/-</sup> C’ was used for the differentiation of oligodendrocytes. **d-** After 24 hours of infection with HSV-1-GFP at a MOI of 1, GFP expression was measured with a fluorescence plate reader in oligodendrocytes differentiated from UNC-93B-deficient iPSCs line C (UNC-93B<sup>-/-</sup> C), from hESCs from a healthy control ( $C^+$  hESC) and iPSCs from a healthy control ( $C^+$  iPSC 2), without (left panel) or with (right panel) IFN- $\alpha$ 2b treatment. The difference in GFP fluorescence intensity between HSV-1-GFP-infected cells and uninfected cells is shown. Mean values  $\pm$  SEM were calculated from two independent experiments, each carried out in duplicate. ANOVA was performed for data shown in **d-**. When significant, Dunnett *t* tests were performed for 2X2 comparisons, and significant results are indicated in corresponding panels (\*  $p < 0.05$ ).

Suppl. Figure 12

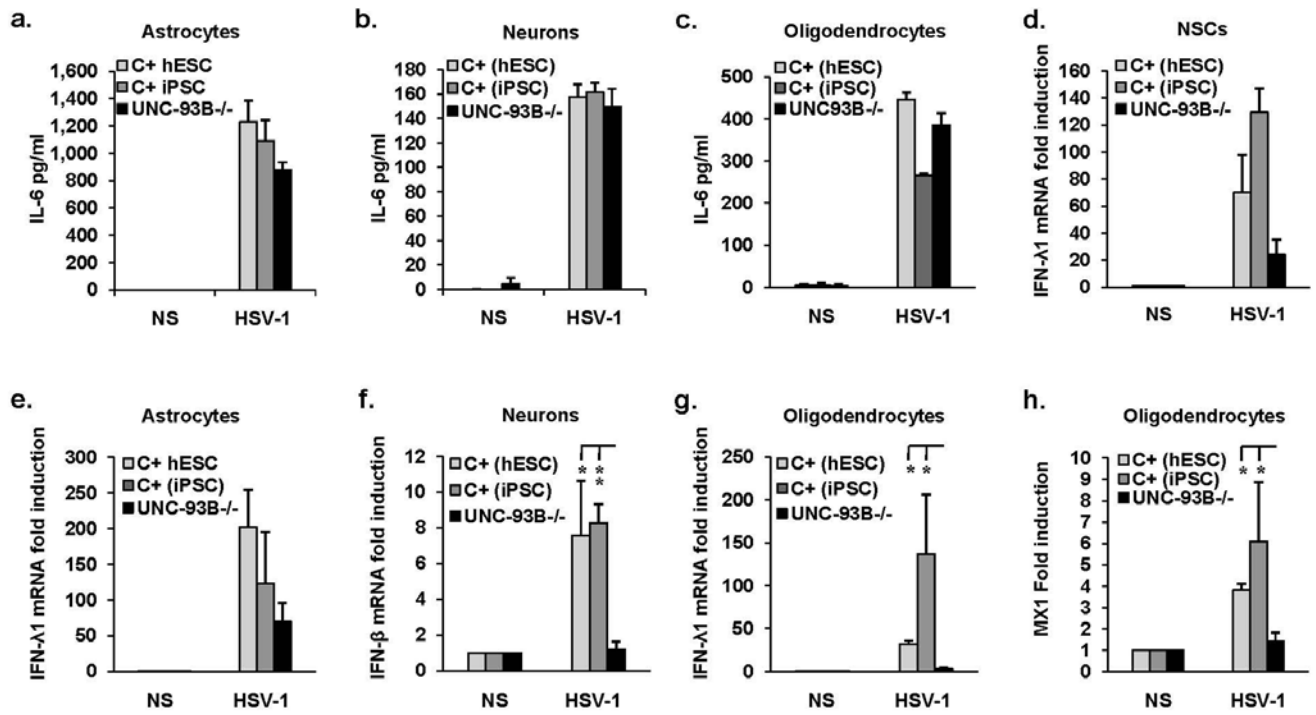



## Suppl. Figure 12. Responses to HSV-1 infection in neurons and glial cells

**a-, b-** and **c-** IL-6 production, as measured by ELISA, in astrocytes (**a-**), neurons (**b-**) and oligodendrocytes (**c-**) differentiated from UNC-93B-deficient iPSCs (UNC-93B<sup>-/-</sup>), hESCs from a healthy control (C<sup>+</sup>(hESC)) and iPSCs from a healthy control (C<sup>+</sup>(iPSC)), after 24 hours of infection with HSV-1. Mean values  $\pm$  SEM were calculated from two independent experiments, each carried out in duplicate. **d-, e-**, IFN- $\lambda$ 1 mRNA induction, as measured by RT-qPCR, after 24 hours of HSV-1 infection, in NSCs (**d-**) and astrocytes (**e-**) differentiated from UNC-93B-deficient iPSCs (UNC-93B<sup>-/-</sup>), hESCs from a healthy control (C<sup>+</sup> hESC), or iPSCs from a healthy control (C<sup>+</sup> iPSC). **f-** IFN- $\beta$  mRNA induction, as measured by RT-qPCR, after 24 hours of HSV-1 infection, in neurons differentiated from UNC-93B-deficient iPSCs (UNC-93B<sup>-/-</sup>), hESCs from a healthy control (C<sup>+</sup> hESC), or iPSCs from a healthy control (C<sup>+</sup> iPSC). **g-** IFN- $\lambda$ 1 mRNA induction, as measured by RT-qPCR, after 24 hours of HSV-1 infection, in oligodendrocytes differentiated from UNC-93B-deficient iPSCs (UNC-93B<sup>-/-</sup>), hESCs from a healthy control (C<sup>+</sup> hESC), or iPSCs from a healthy control (C<sup>+</sup> iPSC). For the data shown in **d-** to **g-**, mean values  $\pm$  SEM were calculated from three independent experiments, each carried out in duplicate. **h-** MX1 mRNA induction, after 24 hours of stimulation with HSV-1, in oligodendrocytes differentiated from UNC-93B-deficient iPSCs line C (UNC-93B<sup>-/-</sup>), from hESCs from a healthy control (C<sup>+</sup> hESC), or from iPSCs from a healthy control (C<sup>+</sup> iPSC). Mean values  $\pm$  SEM were calculated from two independent experiments, each carried out in duplicate. In **a-** to **h-**, UNC-93B-deficient iPSC line ‘UNC-93B<sup>-/-</sup>C’ and one hESC healthy control line were used for the differentiation of various types of CNS cells, the healthy control iPSC line ‘C<sup>+</sup> iPSC 2’ was used for the differentiation of neurons and oligodendrocytes, the healthy control iPSC line ‘C<sup>+</sup> iPSC 3’ was used for the differentiation of NSCs and astrocytes. ANOVA was performed for data shown in **a-** to **h-**. When significant, Dunnett *t* tests were performed for 2X2 comparisons, and significant results are indicated in corresponding panels (\*  $p < 0.05$ , \*\*  $p < 0.01$ ).

**Supple. Table 1. Table of experiments on CNS cells, iPSC and hESC lines, and figures**

| Experiment                                                                                                | No. of UNC-93B <sup>-/-</sup> lines | No. of control lines                                | No. of TLR3 <sup>-/-</sup> lines | Figures                     |
|-----------------------------------------------------------------------------------------------------------|-------------------------------------|-----------------------------------------------------|----------------------------------|-----------------------------|
| Generation and characterization of iPSCs                                                                  | 5 (2 characterized)                 | 4(2 newly characterized and 2 previously described) | 2 (1 characterized)              | 1A-B, S1A-D                 |
| Differentiation to NPC, NSCs, neurons, oligocytes, astrocytes.                                            | 2 (lines H and C)                   | iPSC-1, 2, 3, 4 and hESC H9                         | Line L                           | 2, S2A-D                    |
| Action potential of iPSC-derived neurons                                                                  | line H                              | iPSC 2, 3, 4 and hESC H9                            | Line L                           | S3B-C-E                     |
| Gene expression profile in iPSC-derived glial cells                                                       | line C                              | hESC H9                                             |                                  | S4, Table S4                |
| Fine characterization of glial cells                                                                      | line C                              | iPSC 2 and hESC H9                                  |                                  | S2C-D                       |
| Expression of genes of the TLR3 pathway                                                                   | line C                              | iPSC 2, 3 and hESC H9                               |                                  | S7A-H                       |
| Induction of IFN and IFN-target genes by poly(I:C)                                                        | line C                              | iPSC 2, 3, 4 and hESC H9                            |                                  | 3, S7I-N                    |
| Rescue of poly(I:C)-induced expression of IFN                                                             | line C                              | iPSC 2 and hESC H9                                  |                                  | 3B-D,                       |
| HSV1-GFP replication in control hESC-derived CNS cells                                                    |                                     | hESC H9                                             |                                  | S9                          |
| HSV1-GFP replication in iPSC-derived NSC and astrocytes                                                   | line C and H                        | iPSC 3, 4 and hESC H9                               |                                  | 4A-C, S10, S11              |
| Rescue of HSV-1-GFP replication with IFN- $\alpha$ 2b or IFN- $\beta$ in NSCs and astrocytes              | line C                              | iPSC 3, 4 and hESC H9                               |                                  | S10A, S10C-E, S11A, S11C-E, |
| Rescue of HSV-1-GFP replication in control, but not in UNC93B <sup>-/-</sup> astrocytes, with poly(I:C)   | line C                              | iPSC 3,4 and hESC H9                                |                                  | S11F                        |
| No rescue of HSV-1-GFP replication with IFN- $\lambda$ 1 in NSCs and astrocytes                           | line C                              | hESC H9                                             |                                  | S10F, S11G                  |
| CpG fails to reduce HSV-1 replication in astrocytes                                                       | line C                              | hESC H9                                             |                                  | S12A-D                      |
| HSV-1-GFP replication in neurons                                                                          | lines C and H                       | iPSC 1, 2, 3, 4 and hESC H9                         | line L                           | 4A, 4D, 4E, S13A-B          |
| Rescue of HSV-1-GFP replication in neurons by IFN $\alpha$ 2b or IFN- $\beta$ but not by IFN- $\lambda$ 1 | line C                              | hESC H9                                             |                                  | S13A                        |

|                                                                                                                    |        |                        |        |                |
|--------------------------------------------------------------------------------------------------------------------|--------|------------------------|--------|----------------|
| Rescue of HSV-1-GFP replication in neurons by gene rescue                                                          | line H | iPSC 2 and hESC H9     | line L | 4F, S13B       |
| HSV-1-GFP replication in oligodendrocytes                                                                          | line C | iPSC 2 and hESC H9     |        | 4A, 4G, S14A-B |
| Rescue of HSV-1-GFP replication in oligodendrocytes by IFN $\alpha$ 2b or IFN- $\beta$ but not by IFN- $\lambda$ 1 | line C | iPSC 2 and hESC H9     |        | S14A-B         |
| Production of IFNs and inflammatory cytokines after HSV-1 infection                                                | line C | iPSC 2,3,4 and hESC H9 |        | 4H-K, S15      |

Note:

Control iPSC line 1 = R2CFii = C<sup>+</sup> iPSC 1

Control iPSC line 2 = R2CFiv = C<sup>+</sup> iPSC 2

Control iPSC line 3 = SeV6 = C<sup>+</sup> iPSC 3 (ref<sup>21</sup>)

Control iPSC line 4 = C14 = C<sup>+</sup> iPSC 4 (ref<sup>22</sup>)

**Suppl. Table 2. Total number of variants revealed by whole-exome sequencing in iPSC lines and their parental fibroblast lines**

|              | Cell line                          | Total number of variant | Intersection | Concordance |
|--------------|------------------------------------|-------------------------|--------------|-------------|
| Comparison 1 | Control fibroblasts                | 72829                   | 68391        | 99.94790581 |
|              | Control iPSCs                      | 83671                   |              |             |
| Comparison 2 | UNC-93B <sup>-/-</sup> fibroblasts | 68905                   | 64924        | 99.95158444 |
|              | UNC-93B <sup>-/-</sup> iPSC line C | 67382                   |              |             |
| Comparison 3 | UNC-93B <sup>-/-</sup> fibroblasts | 68905                   | 65463        | 99.9550708  |
|              | UNC-93B <sup>-/-</sup> iPSC line H | 69520                   |              |             |
| Comparison 4 | UNC-93B <sup>-/-</sup> iPSC line C | 67382                   | 64788        | 99.9545369  |
|              | UNC-93B <sup>-/-</sup> iPSC line H | 69520                   |              |             |
| Comparison 5 | TLR3 <sup>-/-</sup> fibroblasts    | 72264                   | 66442        | 99.96039725 |
|              | TLR3 <sup>-/-</sup> iPSCs          | 71184                   |              |             |

Note:

\* Total number of variant = total number of single nucleotide variations and indels.

\* Intersection = number of variant calls common to the two call sets being compared.

\* Concordance = percent genotype concordance of the intersection call set.

\* Differences between the number of variants and concordance were checked by manual inspection of the alignments and result from:

1. Ambiguous alignments in repeat-rich and duplicated regions, leading to false positive variant calls.
2. Technical limitations in indel calling resulting in a higher error rate than for single-nucleotide variant calls.
3. Insufficient read coverage to make confident genotype calls

**Suppl. Table 3. List of genes carrying non reported exonic variants revealed by whole-exome sequencing in control or patient iPSC lines, or their parental fibroblasts.** Only variants not common to iPSC lines and their respective parental fibroblasts are taken into account here.

| Control iPSCs |     |           |                 |               |         |
|---------------|-----|-----------|-----------------|---------------|---------|
| No.           | Chr | Gene name | Transcript ID   | Effect        | Hom/Het |
| 1             | 1   | MIB2      | ENST00000520777 | Nonsynonymous | Het     |
| 2             | 1   | FHAD1     | ENST00000375999 | Stop gained   | Het     |
| 3             | 1   | SLC9A1    | ENST00000545949 | Synonymous    | Het     |
| 4             | 1   | FAM167B   | ENST00000373582 | Nonsynonymous | Het     |
| 5             | 1   | SYDE2     | ENST00000341460 | Synonymous    | Het     |
| 6             | 1   | TNR       | ENST00000367674 | Synonymous    | Het     |
| 7             | 1   | CRB1      | ENST00000543483 | Nonsynonymous | Het     |
| 8             | 2   | GREB1     | ENST00000381486 | Synonymous    | Het     |
| 9             | 2   | ARHGAP25  | ENST00000497079 | Nonsynonymous | Het     |
| 10            | 2   | SP3       | ENST00000455789 | Nonsynonymous | Het     |
| 11            | 2   | C2orf85   | ENST00000343216 | Synonymous    | Het     |
| 12            | 3   | VILL      | ENST00000383759 | Nonsynonymous | Het     |
| 13            | 3   | CELSR3    | ENST00000544264 | Synonymous    | Het     |
| 14            | 3   | MSL2      | ENST00000434835 | Synonymous    | Het     |
| 15            | 3   | MSL2      | ENST00000434835 | Nonsynonymous | Het     |
| 16            | 3   | SOX2      | ENST00000431565 | Synonymous    | Het     |
| 17            | 4   | CXXC4     | ENST00000426831 | Synonymous    | Het     |
| 18            | 5   | NR2F1     | ENST00000327111 | Synonymous    | Het     |
| 19            | 5   | YTHDC2    | ENST00000511372 | Nonsynonymous | Het     |
| 20            | 5   | LRRTM2    | ENST00000274711 | Synonymous    | Het     |
| 21            | 5   | LRRTM2    | ENST00000274711 | Nonsynonymous | Het     |
| 22            | 5   | PCDHGB4   | ENST00000519479 | Nonsynonymous | Het     |

|    |    |          |                 |                      |     |
|----|----|----------|-----------------|----------------------|-----|
| 23 | 6  | BRD2     | ENST00000449085 | Nonsynonymous        | Het |
| 24 | 6  | PNPLA1   | ENST00000457797 | Synonymous           | Het |
| 25 | 7  | RADIL    | ENST00000538469 | Nonsynonymous        | Het |
| 26 | 7  | NEUROD6  | ENST00000297142 | Synonymous           | Het |
| 27 | 7  | BMPER    | ENST00000436222 | Nonsynonymous        | Het |
| 28 | 7  | LHFPL3   | ENST00000543266 | Synonymous           | Het |
| 29 | 7  | CCDC136  | ENST00000464832 | Nonsynonymous        | Het |
| 30 | 8  | RP1L1    | ENST00000382483 | Synonymous           | Het |
| 31 | 8  | KAT6A    | ENST00000406337 | Nonsynonymous        | Het |
| 32 | 8  | PLAG1    | ENST00000429357 | Nonsynonymous        | Het |
| 33 | 8  | C8orf45  | ENST00000541540 | Nonsynonymous        | Het |
| 34 | 9  | BNC2     | ENST00000380666 | Nonsynonymous        | Het |
| 35 | 9  | BNC2     | ENST00000484726 | Splice site acceptor | Het |
| 36 | 9  | FPGS     | ENST00000393706 | Nonsynonymous        | Het |
| 37 | 9  | AK1      | ENST00000223836 | Nonsynonymous        | Het |
| 38 | 9  | FBXW5    | ENST00000433269 | Nonsynonymous        | Het |
| 39 | 10 | ERCC6    | ENST00000355832 | Synonymous           | Het |
| 40 | 10 | PDLIM1   | ENST00000329399 | Synonymous           | Het |
| 41 | 11 | PYGM     | ENST00000540450 | Synonymous           | Het |
| 42 | 11 | BATF2    | ENST00000534177 | Nonsynonymous        | Het |
| 43 | 11 | SART1    | ENST00000542816 | Nonsynonymous        | Het |
| 44 | 11 | USP35    | ENST00000529308 | Synonymous           | Het |
| 45 | 12 | KRT75    | ENST00000252245 | Nonsynonymous        | Het |
| 46 | 13 | DACH1    | ENST00000377826 | Synonymous           | Het |
| 47 | 13 | LIG4     | ENST00000442234 | Nonsynonymous        | Het |
| 48 | 14 | C14orf21 | ENST00000396802 | Nonsynonymous        | Het |

|    |    |           |                 |               |     |
|----|----|-----------|-----------------|---------------|-----|
| 49 | 14 | ACOT2     | ENST00000238651 | Nonsynonymous | Het |
| 50 | 14 | STON2     | ENST00000557055 | Nonsynonymous | Het |
| 51 | 14 | KIF26A    | ENST00000423312 | Synonymous    | Hom |
| 52 | 14 | KIF26A    | ENST00000423312 | Nonsynonymous | Het |
| 53 | 15 | HERC1     | ENST00000443617 | Synonymous    | Het |
| 54 | 15 | NPTN      | ENST00000545878 | Synonymous    | Het |
| 55 | 15 | CLK3      | ENST00000454830 | Synonymous    | Het |
| 56 | 15 | NTRK3     | ENST00000540489 | Synonymous    | Het |
| 57 | 16 | WDR90     | ENST00000549091 | Nonsynonymous | Het |
| 58 | 16 | METRN     | ENST00000219542 | Synonymous    | Het |
| 59 | 16 | MSLNL     | ENST00000543963 | Synonymous    | Het |
| 60 | 16 | BAIAP3    | ENST00000426824 | Synonymous    | Hom |
| 61 | 16 | PAQR4     | ENST00000318782 | Nonsynonymous | Het |
| 62 | 16 | IRX3      | ENST00000329734 | Nonsynonymous | Het |
| 63 | 16 | CNOT1     | ENST00000546037 | Synonymous    | Het |
| 64 | 16 | HYDIN     | ENST00000393567 | Synonymous    | Het |
| 65 | 17 | C17orf63  | ENST00000452648 | Synonymous    | Het |
| 66 | 17 | HSD17B1P1 | ENST00000442612 | Nonsynonymous | Het |
| 67 | 17 | ARMC7     | ENST00000245543 | Synonymous    | Het |
| 68 | 18 | LOXHD1    | ENST00000536736 | Nonsynonymous | Het |
| 69 | 18 | CBLN2     | ENST00000269503 | Synonymous    | Het |
| 70 | 19 | CELF5     | ENST00000541430 | Synonymous    | Het |
| 71 | 19 | DEDD2     | ENST00000336034 | Nonsynonymous | Het |
| 72 | 19 | KIR3DL2   | ENST00000326321 | Nonsynonymous | Het |
| 73 | 20 | PANK2     | ENST00000497424 | Synonymous    | Het |
| 74 | 20 | MAFB      | ENST00000396967 | Synonymous    | Het |

|    |    |              |                 |               |     |
|----|----|--------------|-----------------|---------------|-----|
| 75 | 20 | LAMA5        | ENST00000252999 | Nonsynonymous | Het |
| 76 | 20 | KCNQ2        | ENST00000370224 | Synonymous    | Hom |
| 77 | 22 | TRMT2A       | ENST00000444845 | Synonymous    | Het |
| 78 | 22 | THAP7        | ENST00000399133 | Nonsynonymous | Het |
| 79 | 22 | KIAA1671     | ENST00000406486 | Nonsynonymous | Het |
| 80 | 22 | KIAA1671     | ENST00000406486 | Synonymous    | Het |
| 81 | 22 | RP3-402G11.5 | ENST00000380903 | Nonsynonymous | Het |
| 82 | 22 | ADM2         | ENST00000395738 | Synonymous    | Het |
| 83 | 22 | ODF3B        | ENST00000428989 | Synonymous    | Het |
| 84 | X  | DHRX         | ENST00000444280 | Stop gained   | Het |
| 85 | X  | KDM6A        | ENST00000543216 | Synonymous    | Het |

#### Control fibroblasts

| No. | Chr | Gene name | Transcript ID   | Effect        | Hom/Het |
|-----|-----|-----------|-----------------|---------------|---------|
| 1   | 3   | LAMB2     | ENST00000494831 | Nonsynonymous | Het     |
| 2   | 5   | ARAP3     | ENST00000513878 | Nonsynonymous | Het     |
| 3   | 6   | LAMA2     | ENST00000421865 | Nonsynonymous | Het     |
| 4   | 8   | ZFHX4     | ENST00000521891 | Synonymous    | Hom     |
| 5   | 11  | SCUBE2    | ENST00000520467 | Nonsynonymous | Het     |
| 6   | 11  | PGM2L1    | ENST00000298198 | Nonsynonymous | Het     |
| 7   | 16  | PKD1      | ENST00000423118 | Synonymous    | Het     |
| 8   | 16  | ATXN2L    | ENST00000395547 | Nonsynonymous | Het     |
| 9   | 17  | LLGL2     | ENST00000545227 | Synonymous    | Het     |
| 10  | 17  | CCDC57    | ENST00000392347 | Synonymous    | Het     |
| 11  | 22  | TRIOBP    | ENST00000417174 | Nonsynonymous | Het     |
| 12  | X   | CSF2RA    | ENST00000501036 | Nonsynonymous | Het     |



**UNC-93B<sup>-/-</sup> iPSC line C**

| <b>No.</b> | <b>Chr</b> | <b>Gene name</b> | <b>Transcript ID</b> | <b>Effect</b> | <b>Hom/Het</b> |
|------------|------------|------------------|----------------------|---------------|----------------|
| 1          | 1          | ATAD3B           | ENST00000378737      | Nonsynonymous | Het            |
| 2          | 1          | OR10J3           | ENST00000332217      | Nonsynonymous | Het            |
| 3          | 1          | SELE             | ENST00000367782      | Nonsynonymous | Het            |
| 4          | 1          | CEP350           | ENST00000367607      | Nonsynonymous | Het            |
| 5          | 1          | FAM129A          | ENST00000367511      | Nonsynonymous | Het            |
| 6          | 1          | FAM5C            | ENST00000534846      | Nonsynonymous | Het            |
| 7          | 1          | CTSE             | ENST00000361052      | Nonsynonymous | Het            |
| 8          | 1          | CAPN9            | ENST00000366666      | Nonsynonymous | Het            |
| 9          | 2          | KCNK12           | ENST00000327876      | Synonymous    | Het            |
| 10         | 2          | MOGS             | ENST00000452063      | Nonsynonymous | Het            |
| 11         | 2          | MOGS             | ENST00000452063      | Synonymous    | Het            |
| 12         | 2          | HOXD10           | ENST00000249501      | Synonymous    | Het            |
| 13         | 3          | SEC61A1          | ENST00000464451      | Nonsynonymous | Het            |
| 14         | 3          | IGSF10           | ENST00000282466      | Nonsynonymous | Het            |
| 15         | 3          | SOX2             | ENST00000431565      | Synonymous    | Het            |
| 16         | 4          | KLHL5            | ENST00000546147      | Nonsynonymous | Het            |
| 17         | 4          | TMPRSS11D        | ENST00000545541      | Nonsynonymous | Het            |
| 18         | 4          | LIN54            | ENST00000506560      | Nonsynonymous | Het            |
| 19         | 4          | NR3C2            | ENST00000511528      | Nonsynonymous | Het            |
| 20         | 4          | GRIA2            | ENST00000507898      | Synonymous    | Het            |
| 21         | 5          | DBN1             | ENST00000393565      | Synonymous    | Het            |
| 22         | 6          | NUP153           | ENST00000537253      | Nonsynonymous | Het            |
| 23         | 6          | ZNF165           | ENST00000377325      | Nonsynonymous | Het            |
| 24         | 6          | CUL7             | ENST00000535468      | Nonsynonymous | Het            |

|    |    |           |                 |               |     |
|----|----|-----------|-----------------|---------------|-----|
| 25 | 6  | PKHD1     | ENST00000393616 | Nonsynonymous | Het |
| 26 | 7  | PAXIP1    | ENST00000404141 | Synonymous    | Het |
| 27 | 8  | NKX6-3    | ENST00000524115 | Synonymous    | Het |
| 28 | 8  | PKIA      | ENST00000518467 | Synonymous    | Het |
| 29 | 8  | PKIA      | ENST00000518467 | Synonymous    | Het |
| 30 | 9  | PPAPDC2   | ENST00000381883 | Nonsynonymous | Het |
| 31 | 9  | ADAMTSL1  | ENST00000380566 | Synonymous    | Het |
| 32 | 9  | NPR2      | ENST00000342694 | Nonsynonymous | Het |
| 33 | 9  | PCSK5     | ENST00000545128 | Synonymous    | Het |
| 34 | 10 | C10orf140 | ENST00000449193 | Synonymous    | Het |
| 35 | 10 | ACSL5     | ENST00000356116 | Synonymous    | Het |
| 36 | 10 | NRAP      | ENST00000369360 | Nonsynonymous | Het |
| 37 | 10 | MKI67     | ENST00000537609 | Nonsynonymous | Het |
| 38 | 11 | PIDD      | ENST00000411829 | Nonsynonymous | Het |
| 39 | 11 | OR52A4    | ENST00000380369 | Nonsynonymous | Het |
| 40 | 11 | OR52A4    | ENST00000380369 | Stop gained   | Het |
| 41 | 11 | SF1       | ENST00000433274 | Synonymous    | Het |
| 42 | 11 | KLHL35    | ENST00000539798 | Nonsynonymous | Hom |
| 43 | 11 | RPUSD4    | ENST00000533628 | Synonymous    | Het |
| 44 | 12 | MLL2      | ENST00000301067 | Synonymous    | Het |
| 45 | 13 | RNF17     | ENST00000381921 | Synonymous    | Het |
| 46 | 14 | SYNE2     | ENST00000555002 | Nonsynonymous | Het |
| 47 | 14 | SYNE2     | ENST00000555002 | Synonymous    | Het |
| 48 | 14 | ESRRB     | ENST00000556177 | Synonymous    | Het |
| 49 | 15 | TYRO3     | ENST00000540218 | Nonsynonymous | Het |
| 50 | 15 | MAPKBP1   | ENST00000514566 | Synonymous    | Het |

|    |    |          |                 |               |     |
|----|----|----------|-----------------|---------------|-----|
| 51 | 15 | SPTBN5   | ENST00000320955 | Nonsynonymous | Het |
| 52 | 15 | MFAP1    | ENST00000267812 | Nonsynonymous | Het |
| 53 | 16 | RBL2     | ENST00000262133 | Synonymous    | Hom |
| 54 | 16 | MAF      | ENST00000393350 | Synonymous    | Het |
| 55 | 17 | TP53     | ENST00000509690 | Nonsynonymous | Het |
| 56 | 17 | SLC6A4   | ENST00000401766 | Nonsynonymous | Het |
| 57 | 17 | ICAM2    | ENST00000449662 | Synonymous    | Het |
| 58 | 18 | SMAD7    | ENST00000262158 | Synonymous    | Het |
| 59 | 19 | PCSK4    | ENST00000300954 | Nonsynonymous | Het |
| 60 | 19 | TRMT1    | ENST00000437766 | Nonsynonymous | Het |
| 61 | 19 | FOXA3    | ENST00000302177 | Nonsynonymous | Het |
| 62 | 20 | ID1      | ENST00000376112 | Nonsynonymous | Het |
| 63 | 20 | KCNQ2    | ENST00000430658 | Nonsynonymous | Het |
| 64 | 22 | KIAA1671 | ENST00000406486 | Synonymous    | Het |
| 65 | X  | PTCHD1   | ENST00000379361 | Nonsynonymous | Het |
| 66 | X  | DMD      | ENST00000474231 | Synonymous    | Het |
| 67 | X  | KDM6A    | ENST00000543216 | Synonymous    | Het |
| 68 | X  | SYTL4    | ENST00000455616 | Synonymous    | Het |
| 69 | X  | HNRNPH2  | ENST00000457902 | Synonymous    | Het |

**UNC-93B<sup>-/-</sup> iPSC line H**

| No. | Chr | Gene name | Transcript ID   | Effect        | Hom/Het |
|-----|-----|-----------|-----------------|---------------|---------|
| 1   | 1   | IFFO2     | ENST00000455833 | Synonymous    | Het     |
| 2   | 1   | LRRC7     | ENST00000370957 | Nonsynonymous | Het     |
| 3   | 1   | ZNF326    | ENST00000394590 | Nonsynonymous | Het     |
| 4   | 1   | RBM15     | ENST00000369784 | Synonymous    | Het     |
| 5   | 1   | HIPK1     | ENST00000443627 | Synonymous    | Het     |

|    |   |         |                 |               |     |
|----|---|---------|-----------------|---------------|-----|
| 6  | 1 | BCL9    | ENST00000234739 | Nonsynonymous | Het |
| 7  | 1 | SELE    | ENST00000367782 | Nonsynonymous | Het |
| 8  | 1 | CEP350  | ENST00000367607 | Nonsynonymous | Het |
| 9  | 1 | FAM129A | ENST00000367511 | Nonsynonymous | Het |
| 10 | 1 | FAM5C   | ENST00000534846 | Nonsynonymous | Het |
| 11 | 1 | CAPN9   | ENST00000366666 | Nonsynonymous | Het |
| 12 | 2 | ALK     | ENST00000389048 | Nonsynonymous | Het |
| 13 | 2 | BIRC6   | ENST00000421745 | Synonymous    | Het |
| 14 | 2 | SIX3    | ENST00000260653 | Synonymous    | Het |
| 15 | 2 | NRXN1   | ENST00000536347 | Synonymous    | Het |
| 16 | 2 | BCL11A  | ENST00000538214 | Synonymous    | Het |
| 17 | 2 | MOGS    | ENST00000452063 | Nonsynonymous | Het |
| 18 | 2 | MOGS    | ENST00000452063 | Synonymous    | Het |
| 19 | 2 | TBR1    | ENST00000389554 | Synonymous    | Het |
| 20 | 2 | FIGN    | ENST00000333129 | Synonymous    | Het |
| 21 | 2 | DLX1    | ENST00000469444 | Synonymous    | Het |
| 22 | 2 | HOXD10  | ENST00000249501 | Synonymous    | Het |
| 23 | 2 | EIF4E2  | ENST00000409322 | Synonymous    | Het |
| 24 | 3 | LHFPL4  | ENST00000287585 | Synonymous    | Het |
| 25 | 3 | CACNA1D | ENST00000544977 | Nonsynonymous | Het |
| 26 | 3 | MAGI1   | ENST00000497477 | Nonsynonymous | Het |
| 27 | 3 | SEC61A1 | ENST00000464451 | Nonsynonymous | Het |
| 28 | 3 | MSL2    | ENST00000434835 | Nonsynonymous | Het |
| 29 | 3 | FOXL2   | ENST00000542203 | Synonymous    | Het |
| 30 | 3 | IGSF10  | ENST00000282466 | Nonsynonymous | Het |
| 31 | 3 | SOX2    | ENST00000431565 | Synonymous    | Het |

|    |   |           |                 |               |     |
|----|---|-----------|-----------------|---------------|-----|
| 32 | 4 | PCDH7     | ENST00000543491 | Synonymous    | Het |
| 33 | 4 | KLHL5     | ENST00000546147 | Nonsynonymous | Het |
| 34 | 4 | ATP8A1    | ENST00000264449 | Synonymous    | Het |
| 35 | 4 | TMPRSS11D | ENST00000545541 | Nonsynonymous | Het |
| 36 | 4 | LIN54     | ENST00000506560 | Nonsynonymous | Het |
| 37 | 4 | NR3C2     | ENST00000511528 | Nonsynonymous | Het |
| 38 | 5 | UBE2QL1   | ENST00000399816 | Synonymous    | Het |
| 39 | 5 | ISL1      | ENST00000511384 | Synonymous    | Het |
| 40 | 5 | KCNN2     | ENST00000512097 | Synonymous    | Het |
| 41 | 5 | SNX2      | ENST00000514949 | Synonymous    | Het |
| 42 | 5 | MATR3     | ENST00000510056 | Synonymous    | Het |
| 43 | 5 | NRG2      | ENST00000544729 | Synonymous    | Het |
| 44 | 5 | PPARGC1B  | ENST00000403750 | Synonymous    | Het |
| 45 | 5 | ODZ2      | ENST00000545108 | Synonymous    | Het |
| 46 | 6 | NUP153    | ENST00000537253 | Nonsynonymous | Het |
| 47 | 6 | OR5V1     | ENST00000543825 | Nonsynonymous | Het |
| 48 | 6 | DDX39B    | ENST00000458640 | Synonymous    | Het |
| 49 | 6 | ZBTB22    | ENST00000431845 | Nonsynonymous | Het |
| 50 | 6 | CUL7      | ENST00000535468 | Nonsynonymous | Het |
| 51 | 6 | TTBK1     | ENST00000393984 | Nonsynonymous | Het |
| 52 | 6 | TTBK1     | ENST00000393984 | Synonymous    | Het |
| 53 | 6 | PKHD1     | ENST00000393616 | Nonsynonymous | Het |
| 54 | 6 | SYNCRIP   | ENST00000369622 | Synonymous    | Het |
| 55 | 6 | CITED2    | ENST00000537332 | Nonsynonymous | Het |
| 56 | 6 | CITED2    | ENST00000537332 | Synonymous    | Het |
| 57 | 7 | NEUROD6   | ENST00000297142 | Synonymous    | Het |

|    |    |          |                 |                      |     |
|----|----|----------|-----------------|----------------------|-----|
| 58 | 7  | MAGI2    | ENST00000536571 | Synonymous           | Het |
| 59 | 7  | LHFPL3   | ENST00000543266 | Synonymous           | Het |
| 60 | 7  | PAXIP1   | ENST00000404141 | Synonymous           | Het |
| 61 | 8  | NKX6-3   | ENST00000524115 | Synonymous           | Het |
| 62 | 8  | MAFA     | ENST00000333480 | Synonymous           | Het |
| 63 | 9  | NPR2     | ENST00000342694 | Nonsynonymous        | Het |
| 64 | 9  | CDK5RAP2 | ENST00000345313 | Splice site acceptor | Het |
| 65 | 9  | RC3H2    | ENST00000423239 | Synonymous           | Het |
| 66 | 9  | ZBTB26   | ENST00000373656 | Synonymous           | Het |
| 67 | 10 | ZMYND11  | ENST00000509513 | Nonsynonymous        | Het |
| 68 | 10 | C1QL3    | ENST00000448557 | Synonymous           | Het |
| 69 | 10 | EPC1     | ENST00000319778 | Synonymous           | Het |
| 70 | 10 | KCNMA1   | ENST00000457953 | Synonymous           | Het |
| 71 | 10 | NRAP     | ENST00000369360 | Nonsynonymous        | Het |
| 72 | 10 | MKI67    | ENST00000537609 | Nonsynonymous        | Het |
| 73 | 11 | PIDD     | ENST00000411829 | Nonsynonymous        | Het |
| 74 | 11 | STIM1    | ENST00000533977 | Synonymous           | Het |
| 75 | 11 | OR52A4   | ENST00000380369 | Nonsynonymous        | Het |
| 76 | 11 | OR52A4   | ENST00000380369 | Stop gained          | Het |
| 77 | 11 | RBM14    | ENST00000393979 | Synonymous           | Het |
| 78 | 11 | RBM14    | ENST00000393979 | Splice site donor    | Het |
| 79 | 11 | RPUSD4   | ENST00000533628 | Synonymous           | Het |
| 80 | 12 | CHD4     | ENST00000544484 | Synonymous           | Het |
| 81 | 12 | LRP6     | ENST00000543091 | Synonymous           | Het |
| 82 | 12 | MLL2     | ENST00000301067 | Synonymous           | Het |
| 83 | 12 | TMTC2    | ENST00000548305 | Synonymous           | Het |

|     |    |         |                 |               |     |
|-----|----|---------|-----------------|---------------|-----|
| 84  | 12 | ATXN2   | ENST00000550104 | Synonymous    | Het |
| 85  | 13 | SHISA2  | ENST00000319420 | Synonymous    | Het |
| 86  | 13 | PCDH8   | ENST00000448969 | Synonymous    | Het |
| 87  | 13 | DACH1   | ENST00000377826 | Synonymous    | Het |
| 88  | 13 | SLITRK1 | ENST00000377084 | Synonymous    | Het |
| 89  | 13 | ZIC5    | ENST00000397451 | Synonymous    | Het |
| 90  | 13 | FAM155A | ENST00000375915 | Synonymous    | Het |
| 91  | 13 | SOX1    | ENST00000330949 | Synonymous    | Het |
| 92  | 13 | SOX1    | ENST00000330949 | Synonymous    | Het |
| 93  | 14 | NOVA1   | ENST00000549146 | Synonymous    | Het |
| 94  | 14 | FOXG1   | ENST00000382535 | Synonymous    | Het |
| 95  | 14 | FOXG1   | ENST00000382535 | Nonsynonymous | Het |
| 96  | 14 | NKX2-1  | ENST00000354822 | Synonymous    | Het |
| 97  | 14 | SYNE2   | ENST00000555002 | Nonsynonymous | Het |
| 98  | 14 | SYNE2   | ENST00000555002 | Synonymous    | Het |
| 99  | 14 | YLPM1   | ENST00000423680 | Synonymous    | Het |
| 100 | 14 | ESRRB   | ENST00000556177 | Synonymous    | Het |
| 101 | 14 | ZC3H14  | ENST00000555900 | Synonymous    | Het |
| 102 | 14 | ZC3H14  | ENST00000555900 | Nonsynonymous | Het |
| 103 | 15 | TYRO3   | ENST00000540218 | Nonsynonymous | Het |
| 104 | 15 | MAPKBP1 | ENST00000514566 | Synonymous    | Het |
| 105 | 15 | ARIH1   | ENST00000299305 | Nonsynonymous | Het |
| 106 | 15 | KIF7    | ENST00000394412 | Synonymous    | Het |
| 107 | 15 | NR2F2   | ENST00000394166 | Synonymous    | Het |
| 108 | 16 | FBXL19  | ENST00000380310 | Synonymous    | Het |
| 109 | 16 | ZNF423  | ENST00000535559 | Synonymous    | Het |

|     |    |          |                 |               |     |
|-----|----|----------|-----------------|---------------|-----|
| 110 | 17 | TP53     | ENST00000509690 | Nonsynonymous | Het |
| 111 | 17 | C17orf63 | ENST00000452648 | Synonymous    | Het |
| 112 | 17 | SLC6A4   | ENST00000401766 | Nonsynonymous | Het |
| 113 | 17 | NR1D1    | ENST00000246672 | Nonsynonymous | Het |
| 114 | 17 | WNT3     | ENST00000225512 | Nonsynonymous | Het |
| 115 | 17 | WNT3     | ENST00000225512 | Synonymous    | Het |
| 116 | 17 | HOXB5    | ENST00000239151 | Synonymous    | Het |
| 117 | 17 | LUC7L3   | ENST00000393227 | Synonymous    | Het |
| 118 | 17 | SOX9     | ENST00000455872 | Synonymous    | Het |
| 119 | 18 | MBD2     | ENST00000398398 | Synonymous    | Het |
| 120 | 19 | TRMT1    | ENST00000437766 | Nonsynonymous | Het |
| 121 | 19 | EML2     | ENST00000536630 | Synonymous    | Het |
| 122 | 19 | FOXA3    | ENST00000302177 | Nonsynonymous | Het |
| 123 | 19 | ASPDH    | ENST00000389208 | Nonsynonymous | Hom |
| 124 | 20 | PLCB1    | ENST00000404098 | Synonymous    | Het |
| 125 | 20 | MAFB     | ENST00000396967 | Synonymous    | Het |
| 126 | 20 | KCNQ2    | ENST00000430658 | Nonsynonymous | Het |
| 127 | 22 | KIAA1671 | ENST00000406486 | Synonymous    | Het |
| 128 | X  | PTCHD1   | ENST00000379361 | Synonymous    | Het |
| 129 | X  | IL1RAPL1 | ENST00000378993 | Synonymous    | Het |
| 130 | X  | KDM6A    | ENST00000543216 | Synonymous    | Het |
| 131 | X  | KDM6A    | ENST00000543216 | Synonymous    | Het |
| 132 | X  | KDM6A    | ENST00000543216 | Nonsynonymous | Het |
| 133 | X  | PPP1R3F  | ENST00000055335 | Synonymous    | Het |
| 134 | X  | GPR173   | ENST00000332582 | Synonymous    | Het |
| 135 | X  | WNK3     | ENST00000375169 | Nonsynonymous | Het |



|     |   |         |                 |               |     |
|-----|---|---------|-----------------|---------------|-----|
| 136 | X | AMMECR1 | ENST00000372059 | Synonymous    | Het |
| 137 | X | RAB33A  | ENST00000257017 | Synonymous    | Het |
| 138 | X | FHL1    | ENST00000394155 | Nonsynonymous | Het |
| 139 | X | FMR1    | ENST00000440235 | Synonymous    | Het |
| 140 | X | RAB39B  | ENST00000369454 | Synonymous    | Het |

#### UNC-93B<sup>-/-</sup> fibroblasts

|            | Chr | Gene name  | Transcript ID   | Effect            | Hom/Het |
|------------|-----|------------|-----------------|-------------------|---------|
| <b>No.</b> | 1   | AL359075.1 | ENST00000464631 | Nonsynonymous     | Het     |
| 1          | 6   | ATXN1      | ENST00000450222 | Nonsynonymous     | Het     |
| 2          | 6   | TRIM15     | ENST00000376694 | Synonymous        | Het     |
| 3          | 7   | GRID2IP    | ENST00000435185 | Splice site donor | Het     |
| 4          | 9   | FAM163B    | ENST00000496132 | Synonymous        | Het     |
| 5          | 17  | DNAH17     | ENST00000389840 | Nonsynonymous     | Het     |
| 6          | X   | AMOT       | ENST00000524145 | Nonsynonymous     | Het     |

#### TLR3<sup>-/-</sup> iPSCs

| No. | Chr | Gene name | Transcript ID   | Effect        | Hom/Het |
|-----|-----|-----------|-----------------|---------------|---------|
| 1   | 1   | YRDC      | ENST00000373044 | Nonsynonymous | Hom     |
| 2   | 1   | HIPK1     | ENST00000443627 | Synonymous    | Het     |
| 3   | 1   | ILF2      | ENST00000361891 | Nonsynonymous | Het     |
| 4   | 2   | SIX3      | ENST00000260653 | Synonymous    | Het     |
| 5   | 2   | PLA2R1    | ENST00000392771 | Nonsynonymous | Het     |
| 6   | 2   | CHRNA1    | ENST00000409542 | Synonymous    | Het     |
| 7   | 2   | SPEG      | ENST00000396698 | Synonymous    | Het     |
| 8   | 3   | EOMES     | ENST00000537516 | Synonymous    | Het     |
| 9   | 3   | ARGFX     | ENST00000334384 | Nonsynonymous | Het     |

|    |    |          |                 |               |     |
|----|----|----------|-----------------|---------------|-----|
| 10 | 3  | GATA2    | ENST00000487848 | Synonymous    | Het |
| 11 | 3  | FXR1     | ENST00000491062 | Synonymous    | Het |
| 12 | 3  | SOX2     | ENST00000431565 | Synonymous    | Het |
| 13 | 4  | ODZ3     | ENST00000511685 | Synonymous    | Het |
| 14 | 5  | CTNND2   | ENST00000511377 | Synonymous    | Het |
| 15 | 5  | MATR3    | ENST00000510056 | Synonymous    | Het |
| 16 | 5  | TLX3     | ENST00000296921 | Synonymous    | Het |
| 17 | 6  | SRSF12   | ENST00000452027 | Nonsynonymous | Het |
| 18 | 8  | PXDNL    | ENST00000543296 | Nonsynonymous | Hom |
| 19 | 8  | RP1      | ENST00000220676 | Nonsynonymous | Het |
| 20 | 8  | GDF6     | ENST00000454970 | Nonsynonymous | Het |
| 21 | 8  | ATAD2    | ENST00000287394 | Nonsynonymous | Het |
| 22 | 10 | MINPP1   | ENST00000371996 | Nonsynonymous | Het |
| 23 | 10 | ENTPD1   | ENST00000543964 | Nonsynonymous | Het |
| 24 | 10 | ADRB1    | ENST00000369295 | Synonymous    | Het |
| 25 | 11 | TRIM66   | ENST00000402157 | Nonsynonymous | Het |
| 26 | 11 | OR9G4    | ENST00000302957 | Synonymous    | Het |
| 27 | 14 | REM2     | ENST00000536884 | Synonymous    | Het |
| 28 | 14 | RGS6     | ENST00000556437 | Synonymous    | Het |
| 29 | 14 | PAPOLA   | ENST00000557320 | Synonymous    | Het |
| 30 | 16 | TFAP4    | ENST00000204517 | Nonsynonymous | Het |
| 31 | 17 | NLGN2    | ENST00000302926 | Synonymous    | Het |
| 32 | 20 | MAP1LC3A | ENST00000397709 | Nonsynonymous | Het |
| 33 | 20 | MAFB     | ENST00000396967 | Synonymous    | Het |
| 34 | 21 | DSCAM    | ENST00000404019 | Synonymous    | Het |
| 35 | X  | NHS      | ENST00000398097 | Nonsynonymous | Het |

**TLR3<sup>-/-</sup> fibroblasts**

|            | <b>Chr</b> | <b>Gene name</b> | <b>Transcript ID</b> | <b>Effect</b> | <b>Hom/Het</b> |
|------------|------------|------------------|----------------------|---------------|----------------|
| <b>No.</b> | 1          | AHDC1            | ENST00000374011      | Nonsynonymous | Het            |
| 1          | 2          | ARHGEF4          | ENST00000409359      | Nonsynonymous | Het            |
| 2          | 3          | DCBLD2           | ENST00000404023      | Nonsynonymous | Het            |
| 3          | 6          | NFKBIL1          | ENST00000542852      | Nonsynonymous | Het            |
| 4          | 6          | GPSM3            | ENST00000375043      | Nonsynonymous | Het            |
| 5          | 7          | RADIL            | ENST00000544486      | Nonsynonymous | Het            |
| 6          | 7          | AUTS2            | ENST00000406775      | Nonsynonymous | Het            |
| 7          | 8          | MTDH             | ENST00000519934      | Nonsynonymous | Het            |
| 8          | 11         | LTBP3            | ENST00000530866      | Synonymous    | Het            |
| 9          | 15         | AC090098.1       | ENST00000320930      | Synonymous    | Het            |
| 10         | 16         | THAP11           | ENST00000303596      | Synonymous    | Hom            |
| 11         | 17         | SHMT1            | ENST00000539052      | Synonymous    | Het            |
| 12         | 19         | VASP             | ENST00000245932      | Synonymous    | Hom            |

**Suppl. Table 4. Fold-change expression data comparing glial and rosette stage cells****A) Oligodendrocytes**

| Probeset ID | <i>p</i> -value | Fold-change |
|-------------|-----------------|-------------|
| OLIG1       | 9.25E-05        | 101.529     |
| OLIG2       | 8.12E-07        | 100.273     |
| APOD        | 1.60E-09        | 30.5307     |
| FAM107A     | 0.00603635      | 28.5284     |
| NKX6-2      | 0.00162927      | 17.3379     |
| SCG2        | 0.0113763       | 16.6576     |
| ANGPTL2     | 5.11E-06        | 15.9499     |
| FAM5C       | 0.00134073      | 14.3401     |
| S100A16     | 0.0169086       | 14.3157     |
| FBXO32      | 0.00338735      | 13.2405     |
| IFIT2       | 0.0071538       | 13.1046     |
| LRRC3B      | 0.0108434       | 11.5217     |
| NCAM2       | 0.00170106      | 11.4497     |
| NKX2-2      | 0.0012738       | 11.0907     |
| HS.557245   | 0.00106805      | 9.88082     |
| NEU4        | 6.89E-13        | 9.76081     |
| IFI44L      | 0.0490481       | 9.63491     |
| CPNE4       | 0.000285552     | 9.30938     |
| PTPRZ1      | 0.00905818      | 9.14412     |
| C13ORF15    | 0.0175017       | 8.91703     |
| DLL3        | 0.00701895      | 8.80436     |
| C4ORF18     | 0.00886723      | 8.78147     |

|           |             |         |
|-----------|-------------|---------|
| NTRK2     | 0.000169104 | 8.44403 |
| CBR3      | 0.000316533 | 7.9893  |
| VCAM1     | 0.0100484   | 7.83027 |
| FOSB      | 0.0151363   | 7.7322  |
| AGT       | 0.0147416   | 7.05625 |
| CHST7     | 0.00495793  | 6.98356 |
| IGSF1     | 1.31E-06    | 6.9813  |
| PLP1      | 0.000859161 | 6.96976 |
| GLT25D2   | 0.0149425   | 6.88383 |
| PAQR8     | 0.00269474  | 6.86416 |
| SHD       | 0.00111939  | 6.82636 |
| RGMA      | 0.0139014   | 6.71395 |
| FERMT1    | 1.42E-05    | 6.5888  |
| CADM2     | 0.00198303  | 6.40753 |
| TGFB2     | 0.0101403   | 6.3671  |
| LOC387683 | 1.83E-08    | 6.35476 |
| THBS2     | 0.000481682 | 6.28254 |
| ZCCHC24   | 0.0150545   | 6.25781 |
| PPP1R16B  | 0.00365888  | 6.25147 |
| ACOX2     | 0.0250373   | 6.22504 |
| PITPNC1   | 8.97E-08    | 6.12531 |
| KCNJ16    | 1.95E-07    | 6.03873 |
| ADAMTS3   | 0.00318395  | 5.83543 |
| LRIG1     | 0.00115833  | 5.64456 |
| SLITRK2   | 0.00315307  | 5.61253 |
| MT2A      | 0.00496038  | 5.60193 |

|           |             |         |
|-----------|-------------|---------|
| ENKUR     | 0.000437193 | 5.57016 |
| COL20A1   | 5.08E-09    | 5.55422 |
| OSBPL5    | 1.73E-05    | 5.51981 |
| TMEM100   | 0.000721127 | 5.41546 |
| SOX10     | 2.48E-12    | 5.36065 |
| PLL       | 0.000367519 | 5.34032 |
| DOCK10    | 0.0273465   | 5.16118 |
| ADORA2B   | 0.0149      | 5.08159 |
| PCDH17    | 0.0425718   | 4.9975  |
| SOX9      | 0.0480759   | 4.8917  |
| C1QTNF5   | 0.0200012   | 4.80398 |
| FLJ14213  | 0.0153598   | 4.79227 |
| ADAMTS6   | 0.000255135 | 4.77526 |
| NDRG2     | 0.00226906  | 4.74167 |
| BCAS1     | 1.63E-16    | 4.71722 |
| PDE4B     | 0.00101978  | 4.69186 |
| SAMD9     | 0.00857704  | 4.67529 |
| EDNRB     | 0.00892825  | 4.6718  |
| RASL12    | 7.53E-05    | 4.54816 |
| CHST9     | 0.00197748  | 4.50338 |
| HS.576533 | 0.0021342   | 4.48207 |
| HS.518794 | 0.00671485  | 4.43985 |
| RAMP1     | 0.0115904   | 4.41404 |
| PPP1R3C   | 0.0362624   | 4.33996 |
| ACCN2     | 0.00265763  | 4.33494 |
| MT1A      | 0.0143976   | 4.24297 |

|           |             |         |
|-----------|-------------|---------|
| CD9       | 0.0457264   | 4.23502 |
| SLC15A2   | 0.00342969  | 4.19856 |
| GPR137B   | 0.00303853  | 4.17504 |
| SCD5      | 0.0250978   | 4.03682 |
| MAG       | 4.20E-18    | 4.01088 |
| WSCD1     | 0.0279755   | 4.00743 |
| MGC16121  | 0.039749    | 3.99948 |
| OPHN1     | 0.000366575 | 3.95133 |
| EGFR      | 6.54E-07    | 3.93821 |
| SH3PXD2B  | 0.00212287  | 3.91371 |
| HS.571502 | 0.00284148  | 3.91229 |
| KLHL4     | 0.0022517   | 3.85871 |
| ASS1      | 0.0407322   | 3.80477 |
| SEPP1     | 0.00244276  | 3.64026 |
| ST3GAL5   | 0.013745    | 3.60573 |
| DSEL      | 5.26E-08    | 3.5923  |
| GALNT13   | 0.000174256 | 3.58605 |
| KLF2      | 0.0290107   | 3.58258 |
| HS.543067 | 0.000694736 | 3.58064 |
| HS.493592 | 0.0138214   | 3.5747  |
| SSPN      | 0.0291267   | 3.54667 |
| CCND3     | 0.0024428   | 3.53692 |
| EPN2      | 0.00229523  | 3.51679 |
| ELFN2     | 0.0190794   | 3.47553 |
| NOVA1     | 0.00253326  | 3.46155 |
| HS.157613 | 8.93E-07    | 3.4516  |

|           |             |         |
|-----------|-------------|---------|
| LRRRC8D   | 0.000892456 | 3.43671 |
| CDH15     | 1.75E-07    | 3.42352 |
| ANGPTL4   | 0.0404165   | 3.35295 |
| FLJ11235  | 0.00316333  | 3.34071 |
| CST3      | 0.0249805   | 3.30934 |
| HS.546710 | 1.92E-07    | 3.29301 |
| RLBP1     | 3.79E-08    | 3.29283 |
| LOC644571 | 1.16E-07    | 3.29023 |
| ZFP36L2   | 0.0251129   | 3.27755 |
| PLD5      | 0.0417505   | 3.27322 |
| SORL1     | 0.0380233   | 3.26733 |
| VGLL3     | 0.0403673   | 3.23012 |
| SPTAN1    | 0.000707738 | 3.22921 |
| GPR17     | 4.64E-12    | 3.22538 |
| NPAS3     | 0.0241259   | 3.20812 |
| CDC42EP4  | 0.00959412  | 3.20628 |
| MTTP      | 0.04925     | 3.19926 |
| TNFRSF14  | 0.000135081 | 3.19755 |
| MGC42367  | 0.0318031   | 3.18389 |
| PSMB9     | 0.0230213   | 3.12327 |
| HS.134779 | 1.54E-05    | 3.07092 |
| GABBR1    | 0.0170772   | 3.05318 |
| ABHD4     | 0.0019461   | 3.04721 |
| CXCL16    | 0.00426318  | 3.00609 |
| GRIA4     | 3.88E-06    | 3.00022 |
| ZFPM2     | 0.014102    | 3.00018 |



|           |             |         |
|-----------|-------------|---------|
| KCNIP3    | 5.17E-07    | 2.9966  |
| WFDC1     | 6.08E-05    | 2.96731 |
| SH3D19    | 0.0275976   | 2.95075 |
| TBC1D16   | 0.000239276 | 2.90117 |
| ENPP6     | 1.45E-08    | 2.8991  |
| LRP1B     | 0.0126732   | 2.87842 |
| FIBP      | 1.97E-05    | 2.82438 |
| PDSS1     | 0.00290252  | 2.82384 |
| HS.423734 | 0.0038446   | 2.82343 |
| ZNRF3     | 0.0360515   | 2.79769 |
| MAN2B2    | 0.0369264   | 2.79349 |
| MMP28     | 1.54E-05    | 2.79041 |
| ELOVL1    | 0.0203222   | 2.78617 |
| POLE4     | 8.13E-05    | 2.78511 |
| RAPGEF4   | 0.00208419  | 2.77834 |
| FAM59B    | 0.0493688   | 2.76818 |
| HS.573264 | 0.00546008  | 2.75873 |
| MAEL      | 2.20E-06    | 2.74366 |
| NAGPA     | 0.000782983 | 2.74239 |
| B3GALTL   | 0.0419335   | 2.72839 |
| CRIPT     | 0.000184327 | 2.71958 |
| DDR1      | 0.0223777   | 2.69648 |
| FIBIN     | 0.0142413   | 2.68526 |
| SP110     | 0.0310238   | 2.68467 |
| KCNS1     | 0.000954313 | 2.6823  |
| TRAF3IP2  | 0.0107732   | 2.66705 |

|           |             |         |
|-----------|-------------|---------|
| WDR21A    | 0.0463735   | 2.65933 |
| MDGA2     | 0.0125411   | 2.65337 |
| ZNF365    | 0.00396962  | 2.65011 |
| DAG1      | 0.0347291   | 2.64376 |
| ALG13     | 0.0131881   | 2.64271 |
| GNA12     | 0.0095578   | 2.63904 |
| UBL3      | 0.0462361   | 2.62518 |
| C1ORF122  | 0.0012034   | 2.62516 |
| HS.554391 | 9.72E-09    | 2.62259 |
| RTKN      | 0.0239263   | 2.617   |
| SLC6A11   | 5.83E-06    | 2.61129 |
| PDZRN4    | 0.00667343  | 2.60886 |
| WDR81     | 0.00624445  | 2.59859 |
| TTYH2     | 0.00164888  | 2.59615 |
| HS.159080 | 0.0303015   | 2.59268 |
| HAPLN4    | 0.0326982   | 2.5824  |
| LOC645236 | 0.041786    | 2.5803  |
| ABHD3     | 0.0034179   | 2.56646 |
| LOC643320 | 0.000351185 | 2.55452 |
| SIK3      | 0.00638801  | 2.54948 |
| MBP       | 0.0292151   | 2.5477  |
| C8ORF46   | 0.0498513   | 2.53899 |
| C10ORF65  | 0.00411516  | 2.53856 |
| DLG5      | 0.0079372   | 2.53624 |
| HS.556255 | 0.00296538  | 2.52835 |
| ADCY8     | 0.00204732  | 2.51783 |

|           |             |         |
|-----------|-------------|---------|
| HCG22     | 3.26E-05    | 2.51668 |
| SNX22     | 1.19E-05    | 2.5139  |
| F8A1      | 0.00355357  | 2.51188 |
| HS.25318  | 0.0154508   | 2.5101  |
| MOSC1     | 0.0436842   | 2.50927 |
| HS.50125  | 0.000147766 | 2.50414 |
| C1ORF188  | 0.0121533   | 2.48725 |
| RGR       | 8.14E-06    | 2.48172 |
| LAMP1     | 0.00876089  | 2.47919 |
| ACTN2     | 0.0024921   | 2.47553 |
| PLCD4     | 0.00191206  | 2.47441 |
| FOXRED2   | 0.00612248  | 2.4649  |
| NPNT      | 0.00103905  | 2.45756 |
| NTRK3     | 0.0278773   | 2.45568 |
| DPP7      | 0.0252758   | 2.44493 |
| NDUFC2    | 0.00242496  | 2.44219 |
| PSMB10    | 0.0152355   | 2.41961 |
| POLR2L    | 0.00878535  | 2.41824 |
| DGCR2     | 0.0483704   | 2.41365 |
| FAM120A   | 0.00232739  | 2.39403 |
| COMMD4    | 0.0132721   | 2.39397 |
| LOC441019 | 0.0120402   | 2.3907  |
| MRPS18A   | 0.00125513  | 2.38397 |
| DEGS1     | 0.00289237  | 2.37398 |
| ATP2C2    | 8.27E-06    | 2.372   |
| LOC644366 | 0.0145314   | 2.37109 |

|           |             |         |
|-----------|-------------|---------|
| PTRH1     | 0.013145    | 2.36105 |
| ERMAP     | 0.00189066  | 2.35875 |
| ANKRD57   | 0.0012729   | 2.3518  |
| HGD       | 1.76E-07    | 2.3439  |
| FAM102A   | 0.000681359 | 2.33767 |
| PDE3A     | 1.16E-08    | 2.33403 |
| LOC150356 | 0.000560474 | 2.32851 |
| GRAMD3    | 0.0384994   | 2.328   |
| HAP1      | 0.00210244  | 2.32353 |
| VAX2      | 0.00759033  | 2.31743 |
| PAQR7     | 0.00577843  | 2.31671 |
| DOLK      | 0.0212527   | 2.31209 |
| VPS8      | 0.00165392  | 2.306   |
| ALDH9A1   | 2.17E-05    | 2.30348 |
| MAML2     | 0.00996887  | 2.30139 |
| SEPX1     | 0.0274688   | 2.29839 |
| C19ORF70  | 0.0230888   | 2.29714 |
| CENPB     | 0.0409693   | 2.2964  |
| C9ORF156  | 3.96E-05    | 2.2862  |
| ST7OT1    | 0.0208644   | 2.28312 |
| SPNS1     | 4.01E-06    | 2.2791  |
| MTG1      | 0.000462569 | 2.27875 |
| ZDHHC14   | 0.00475427  | 2.26914 |
| B3GAT2    | 0.000286094 | 2.26121 |
| IGDCC4    | 0.047501    | 2.25387 |
| DNLZ      | 0.00201715  | 2.25272 |

|           |             |         |
|-----------|-------------|---------|
| DAPK2     | 0.00126439  | 2.24832 |
| LRRTM3    | 0.00124821  | 2.24751 |
| MYO5A     | 0.013365    | 2.24666 |
| NR1H3     | 0.0395649   | 2.24028 |
| CD34      | 0.0363322   | 2.24    |
| HS.535360 | 0.00473751  | 2.23964 |
| C9ORF103  | 0.0265181   | 2.23455 |
| PHKG1     | 1.49E-06    | 2.22705 |
| MRPL24    | 0.0160917   | 2.22615 |
| URM1      | 0.00111259  | 2.22163 |
| PPP1R1C   | 0.00111862  | 2.21776 |
| HPR       | 4.12E-10    | 2.21527 |
| SLC9A9    | 0.00112882  | 2.2139  |
| HECTD3    | 0.00128484  | 2.21273 |
| WDR45     | 0.000211013 | 2.20724 |
| SGPL1     | 0.000127936 | 2.20472 |
| NDUFB2    | 0.00275256  | 2.20453 |
| PHLPP1    | 0.00704766  | 2.20072 |
| RPP40     | 0.0251999   | 2.19748 |
| POLR2F    | 0.000705833 | 2.19688 |
| FAM118B   | 0.000350228 | 2.19164 |
| HADHA     | 0.00496991  | 2.19114 |
| TTC15     | 1.33E-05    | 2.18429 |
| ITPKA     | 0.0360723   | 2.18419 |
| QKI       | 0.0290018   | 2.18329 |
| LONRF1    | 0.00709257  | 2.17976 |

|           |             |         |
|-----------|-------------|---------|
| IL17RB    | 0.0430137   | 2.17755 |
| HS.534096 | 0.00145375  | 2.1711  |
| TMEM117   | 0.0444653   | 2.16828 |
| SRPK3     | 1.44E-05    | 2.15285 |
| TOB1      | 0.0381241   | 2.15091 |
| CC2D2A    | 0.0103763   | 2.15063 |
| ABCA9     | 2.93E-06    | 2.14305 |
| KEAP1     | 0.0135922   | 2.13778 |
| AGPAT5    | 0.0227101   | 2.13769 |
| CHMP4A    | 8.95E-05    | 2.13661 |
| OSTM1     | 0.000687168 | 2.13458 |
| P2RX7     | 0.00358477  | 2.13431 |
| ACYP2     | 0.0081243   | 2.1321  |
| C9ORF114  | 0.0345359   | 2.12684 |
| TNFSF12   | 0.00531462  | 2.12118 |
| SLC40A1   | 0.00631144  | 2.11854 |
| FLJ36070  | 0.00784945  | 2.1145  |
| VPS45     | 0.00207339  | 2.10789 |
| HNF4G     | 3.33E-05    | 2.10297 |
| MEPCE     | 0.00057966  | 2.10241 |
| SNX27     | 0.000254985 | 2.09733 |
| C2ORF76   | 0.0014697   | 2.09696 |
| LOC649801 | 0.028843    | 2.09603 |
| HS.65839  | 0.00563057  | 2.09566 |
| MAGED4B   | 0.000949105 | 2.09531 |
| ENTPD1    | 0.00134996  | 2.09156 |

|           |             |         |
|-----------|-------------|---------|
| PPP2R5A   | 0.0319189   | 2.08859 |
| HS.562110 | 0.0040296   | 2.08497 |
| C16ORF7   | 0.0435033   | 2.08321 |
| HS.553187 | 0.0273506   | 2.07656 |
| UGT8      | 0.00173257  | 2.07489 |
| DIRC2     | 0.0112026   | 2.07374 |
| LRRC58    | 0.00799811  | 2.07192 |
| C11ORF9   | 0.00882695  | 2.06997 |
| FDX1L     | 0.00131286  | 2.06704 |
| KIAA0494  | 0.0370062   | 2.06461 |
| RAB5C     | 0.000652435 | 2.06456 |
| CAPN3     | 1.62E-05    | 2.05899 |
| OFD1      | 0.00800751  | 2.05754 |
| RASSF4    | 0.0348358   | 2.05385 |
| C17ORF82  | 6.24E-06    | 2.04462 |
| FLJ20021  | 0.0113291   | 2.04009 |
| CAMK2G    | 1.30E-05    | 2.03831 |
| BDH2      | 0.00591055  | 2.03729 |
| CYP2U1    | 0.0179187   | 2.03355 |
| C2ORF27A  | 0.000198393 | 2.03335 |
| CRELD2    | 0.00309741  | 2.03242 |
| MED29     | 0.000352259 | 2.03238 |
| UBXN8     | 0.0254385   | 2.03086 |
| INPP1     | 0.0367323   | 2.02659 |
| IL12A     | 0.0169293   | 2.02606 |
| SH3GLB1   | 0.0231382   | 2.02235 |

|           |             |          |
|-----------|-------------|----------|
| PEPD      | 0.034008    | 2.01443  |
| MOG       | 2.81E-06    | 2.01218  |
| LMF1      | 0.0439784   | 2.01102  |
| EAF2      | 0.0355112   | 2.00992  |
| CLN3      | 0.000337906 | 2.00852  |
| GPR172A   | 0.0303844   | 2.00366  |
| RAPGEF1   | 0.00075171  | 2.00301  |
| VPS18     | 0.0116934   | 2.003    |
| CSNK1G2   | 0.0116974   | -2.00103 |
| ZSWIM4    | 0.00981746  | -2.004   |
| FIGN      | 0.00498295  | -2.00594 |
| LOC727751 | 0.00112139  | -2.0074  |
| SIRT4     | 0.0195615   | -2.00889 |
| HS.448059 | 0.000551575 | -2.0094  |
| RNF149    | 0.00701659  | -2.01174 |
| C10ORF47  | 0.00607555  | -2.01377 |
| ATP11C    | 0.0032172   | -2.01786 |
| LOC646168 | 0.0197967   | -2.03164 |
| STRC      | 2.02E-06    | -2.03174 |
| ASB12     | 9.77E-05    | -2.03399 |
| C6ORF130  | 0.0156557   | -2.03842 |
| ALKBH5    | 8.50E-06    | -2.04278 |
| LOXHD1    | 0.000285005 | -2.04403 |
| UVRAG     | 0.0165013   | -2.04677 |
| ERO1L     | 0.000793606 | -2.05114 |
| WWP1      | 0.0195543   | -2.0616  |



|           |             |          |
|-----------|-------------|----------|
| YOD1      | 0.00346887  | -2.06325 |
| HS.559770 | 0.00410003  | -2.06434 |
| SLC27A2   | 0.0122725   | -2.06481 |
| LOC728411 | 0.0424063   | -2.07166 |
| YPEL2     | 0.0320155   | -2.07292 |
| WDR60     | 0.0175529   | -2.07411 |
| CNTNAP3B  | 0.0012993   | -2.07566 |
| PIGL      | 0.0162779   | -2.0771  |
| LOC91661  | 0.0111615   | -2.07716 |
| DNAH2     | 0.00127266  | -2.08101 |
| C9ORF126  | 0.0426065   | -2.08235 |
| PPARGC1A  | 0.0110371   | -2.08283 |
| HIT-40    | 0.0291636   | -2.08405 |
| CYP27C1   | 0.00121484  | -2.0872  |
| TNFAIP8L1 | 0.0361383   | -2.08767 |
| SERTAD2   | 0.0391906   | -2.08957 |
| GOLGA8A   | 0.0395935   | -2.09368 |
| NCK1      | 0.00570318  | -2.09949 |
| MRI1      | 0.00574948  | -2.10139 |
| ZNF219    | 0.0459233   | -2.106   |
| CEBPG     | 0.0445386   | -2.10927 |
| SLC9A5    | 0.0144796   | -2.14787 |
| MTFR1     | 0.0481356   | -2.17399 |
| HS.520591 | 0.000367204 | -2.17514 |
| EGLN1     | 0.027238    | -2.17576 |
| MBD2      | 0.0284908   | -2.18805 |

|           |             |          |
|-----------|-------------|----------|
| POLB      | 0.00337407  | -2.194   |
| CTDSPL    | 0.00075442  | -2.19582 |
| FAM49A    | 0.0254794   | -2.20238 |
| AGTPBP1   | 0.00374226  | -2.2057  |
| DR1       | 0.00188236  | -2.2184  |
| LOC644128 | 0.026581    | -2.22055 |
| HS.547277 | 0.00469614  | -2.23923 |
| KCNJ12    | 0.000294973 | -2.24272 |
| LPCAT4    | 0.000628345 | -2.25223 |
| PDE7A     | 0.00517291  | -2.25843 |
| MSI1      | 0.00709711  | -2.26881 |
| CD46      | 0.000355741 | -2.27975 |
| RELL2     | 0.00839709  | -2.28182 |
| VANGL2    | 0.0465522   | -2.2865  |
| ZNF451    | 0.00115174  | -2.2994  |
| UCHL1     | 0.00738193  | -2.30566 |
| FKBP1B    | 0.0327188   | -2.32319 |
| USP53     | 0.00305445  | -2.32412 |
| MSX2      | 0.00939056  | -2.32451 |
| PLS1      | 0.0478984   | -2.32869 |
| KCNJ4     | 0.00108575  | -2.33387 |
| LNX2      | 0.000144742 | -2.35414 |
| KCTD9     | 0.0118522   | -2.35807 |
| N4BP3     | 0.00386166  | -2.35889 |
| GFPT1     | 0.00132105  | -2.36169 |
| JMJD1A    | 0.0297894   | -2.36657 |

|           |             |          |
|-----------|-------------|----------|
| SLC36A4   | 0.0139511   | -2.37243 |
| SFRS13B   | 0.000943723 | -2.37591 |
| ACTL6A    | 0.000382327 | -2.37949 |
| INTS8     | 0.000226543 | -2.3928  |
| JAG2      | 0.0110857   | -2.41793 |
| MGC18216  | 6.48E-05    | -2.41927 |
| MS4A8B    | 0.0458367   | -2.41943 |
| BTBD3     | 0.0465445   | -2.43532 |
| MAP3K9    | 0.0230349   | -2.46015 |
| ZBTB46    | 0.0458505   | -2.48323 |
| C14ORF4   | 0.0338396   | -2.48614 |
| MAP4K1    | 0.0434537   | -2.48862 |
| C11ORF47  | 1.78E-07    | -2.49831 |
| TIFA      | 0.0269361   | -2.50159 |
| NARF      | 0.0245554   | -2.50261 |
| TSPAN4    | 0.0135899   | -2.53154 |
| ZNF330    | 0.000643307 | -2.53164 |
| FAM69B    | 0.0166785   | -2.53672 |
| KIAA1324  | 0.00829083  | -2.53729 |
| F12       | 0.0338401   | -2.55188 |
| PLEKHA1   | 0.00688433  | -2.55863 |
| KIAA1467  | 0.00302519  | -2.56523 |
| HS.568479 | 0.0386942   | -2.57494 |
| LOC728452 | 0.0203549   | -2.59794 |
| TMEM2     | 0.0492569   | -2.59948 |
| ADAMTS7   | 0.0254338   | -2.59954 |

|           |             |          |
|-----------|-------------|----------|
| B4GALT6   | 3.15E-05    | -2.61298 |
| LOC388494 | 0.043927    | -2.61406 |
| MYADM     | 0.038823    | -2.61481 |
| FAM59A    | 0.0116136   | -2.61824 |
| HS.556018 | 0.00532991  | -2.67536 |
| HIC2      | 0.0442079   | -2.68748 |
| TMEM74    | 0.0275344   | -2.69658 |
| FLJ22795  | 0.00128735  | -2.78184 |
| PHIP      | 0.00912665  | -2.78377 |
| PAPSS2    | 0.0382878   | -2.79312 |
| PLCG2     | 0.0463073   | -2.79514 |
| KCNMB4    | 0.0328588   | -2.84478 |
| TMEM130   | 0.0218618   | -2.85272 |
| BASP1     | 0.0382806   | -2.88582 |
| SLC25A36  | 0.000748245 | -2.89564 |
| HS.538861 | 0.00866464  | -2.91183 |
| KIAA0895  | 0.032197    | -2.98169 |
| SLC29A3   | 0.00405512  | -3.0149  |
| CACNA1H   | 0.0421761   | -3.01744 |
| LPIN1     | 0.00128247  | -3.0765  |
| KISS1R    | 0.0318304   | -3.08319 |
| PIM1      | 0.0394346   | -3.08783 |
| TSC22D3   | 0.0115287   | -3.09829 |
| TBC1D9    | 0.0311841   | -3.19096 |
| PACSIN1   | 0.02188     | -3.19194 |
| PCK2      | 0.0433592   | -3.23185 |

|           |             |          |
|-----------|-------------|----------|
| PREP      | 0.000240519 | -3.24953 |
| IGFBP2    | 0.0269581   | -3.27518 |
| LOC653344 | 0.00388699  | -3.41496 |
| TMEM88    | 0.0035325   | -3.46285 |
| KLHL3     | 0.0105631   | -3.53969 |
| LOC400406 | 0.0200501   | -3.54641 |
| DNAJA4    | 0.039963    | -3.62946 |
| ROD1      | 2.66E-05    | -3.69593 |
| CD83      | 0.00373044  | -3.73489 |
| IL11RA    | 0.00944154  | -3.75385 |
| WDR86     | 0.0400003   | -4.01097 |
| JARID2    | 0.0159137   | -4.04305 |
| C10ORF35  | 0.0209646   | -4.28768 |
| PRRT2     | 0.00155416  | -4.31773 |
| FLRT2     | 0.0173201   | -4.9324  |
| HS.137274 | 0.0018824   | -5.10977 |
| ARID3A    | 0.0100926   | -5.17496 |
| JUP       | 0.000519663 | -5.44576 |
| SEZ6L2    | 0.0130687   | -5.66748 |
| MIAT      | 0.0268865   | -5.95144 |
| ZNF558    | 0.0079276   | -5.97868 |
| REM2      | 0.0148874   | -6.16244 |
| PCDHB5    | 0.0137096   | -6.35218 |
| FBN2      | 0.0174373   | -6.81214 |
| TSHZ2     | 0.0228563   | -7.06524 |
| DUSP6     | 0.00524751  | -7.2336  |

|        |            |          |
|--------|------------|----------|
| TFAP2C | 0.00879396 | -7.52966 |
| IGSF21 | 0.0371087  | -7.54059 |
| FBLN1  | 0.0037725  | -8.81554 |
| STC2   | 0.0374311  | -8.87065 |
| LMO3   | 0.0418667  | -9.21099 |
| BEX2   | 0.0267527  | -9.25593 |
| SYT13  | 0.0490206  | -10.4285 |
| ALPL   | 0.00504025 | -14.7487 |
| STMN2  | 0.0215016  | -51.8557 |

**B) Astrocytes**

| Probeset ID | <i>p</i> -value | Fold-change |
|-------------|-----------------|-------------|
| A2M         | 0.00744422      | 56.8967     |
| GFAP        | 0.0148601       | 40.4864     |
| CD44        | 0.0248124       | 29.1963     |
| CAPN5       | 3.51E-06        | 24.4543     |
| C1QL1       | 0.00920762      | 22.6696     |
| SYNM        | 0.00147902      | 12.9679     |
| HS.204481   | 0.00847691      | 10.7017     |
| MAN1C1      | 0.00455299      | 10.6372     |
| IFI16       | 0.0182172       | 10.4749     |
| GAD1        | 0.0328599       | 10.0463     |
| PLCH2       | 0.0452698       | 10.0228     |
| SLC47A2     | 0.000841806     | 9.98104     |
| RASD1       | 0.0187172       | 8.93283     |

|           |             |         |
|-----------|-------------|---------|
| CFI       | 0.0164621   | 8.76872 |
| C21ORF62  | 0.0166782   | 8.14944 |
| CDKN1A    | 0.00817105  | 8.12452 |
| SIK1      | 0.000296215 | 6.95357 |
| HS3ST3A1  | 0.0415969   | 6.62482 |
| ZNF436    | 0.00218616  | 6.25592 |
| SEPT5     | 0.0261995   | 6.24743 |
| METTL7B   | 0.0176002   | 6.01326 |
| RFTN1     | 0.0245109   | 5.96816 |
| NTN1      | 0.035107    | 5.66477 |
| LOC648256 | 0.0416742   | 5.60352 |
| AP1S2     | 0.00597848  | 5.35666 |
| ANGPT1    | 0.0108217   | 5.34854 |
| B2M       | 0.0191145   | 5.25815 |
| ZFP36     | 0.0429054   | 5.14805 |
| DHRS3     | 0.0356295   | 4.98468 |
| PLCD3     | 0.0260121   | 4.9428  |
| PLCE1     | 0.0367825   | 4.80394 |
| ADORA1    | 0.0313097   | 4.61886 |
| CHL1      | 0.019655    | 4.56957 |
| C19ORF4   | 0.0498638   | 4.56331 |
| TMPRSS5   | 0.000733954 | 4.38291 |
| ALK       | 0.0306266   | 4.176   |
| HS.371609 | 0.0180365   | 4.0658  |
| HS.543076 | 0.0306333   | 4.05194 |
| APP       | 0.00545355  | 4.01134 |

|           |            |         |
|-----------|------------|---------|
| CDCA7L    | 0.00946097 | 3.98166 |
| PSRC1     | 0.0284438  | 3.90488 |
| TP53I11   | 0.00101033 | 3.83794 |
| IRS2      | 0.0307132  | 3.83247 |
| RASD2     | 0.00719862 | 3.78824 |
| KIAA1545  | 0.0131975  | 3.76059 |
| RGL1      | 0.0155085  | 3.75393 |
| MAP1A     | 0.0219089  | 3.7427  |
| GPR37     | 0.0384487  | 3.73272 |
| ARC       | 0.0457629  | 3.71    |
| TIMP2     | 0.0179139  | 3.64771 |
| FILIP1L   | 0.00287482 | 3.62644 |
| LHFP      | 0.0488803  | 3.61376 |
| SOCS3     | 0.0101283  | 3.45294 |
| RNF180    | 0.0011392  | 3.45198 |
| LOC646332 | 3.59E-05   | 3.44979 |
| PLEKHH2   | 0.00260225 | 3.44906 |
| TCF12     | 0.00695513 | 3.43548 |
| DACT2     | 0.0159493  | 3.42863 |
| LOC643169 | 0.0117059  | 3.41516 |
| DRAM1     | 0.0304152  | 3.41283 |
| CLASP2    | 0.0344396  | 3.33711 |
| PTP4A3    | 0.00364599 | 3.28222 |
| GPR88     | 0.00178426 | 3.2776  |
| PLXNA3    | 0.0047638  | 3.25466 |
| FXYD7     | 0.00343761 | 3.23621 |



|           |             |         |
|-----------|-------------|---------|
| FZD5      | 0.00707026  | 3.22863 |
| EPHX1     | 0.0394188   | 3.22614 |
| MYO5B     | 0.000710179 | 3.19048 |
| KLF13     | 0.00302579  | 3.18721 |
| RNF19A    | 0.0258032   | 3.17826 |
| MARCH3    | 0.0168629   | 3.16992 |
| SOCS2     | 0.00722712  | 3.16301 |
| TGFB111   | 0.0453181   | 3.14843 |
| ENAH      | 0.00858364  | 3.12698 |
| SHC2      | 0.00188026  | 3.11855 |
| HS.22689  | 0.0218623   | 3.08373 |
| UAP1L1    | 0.0475672   | 3.08325 |
| HS.184721 | 0.0132258   | 3.08172 |
| GAS7      | 0.0288612   | 3.02678 |
| PSCD1     | 0.00102248  | 2.98667 |
| HS.193767 | 0.00843577  | 2.97699 |
| HRK       | 0.0153333   | 2.97446 |
| ETV6      | 0.0134162   | 2.96587 |
| PCDH8     | 0.0264653   | 2.90768 |
| MAP3K1    | 0.0102233   | 2.89344 |
| KIAA0802  | 0.000929403 | 2.88655 |
| PDE8B     | 0.0466464   | 2.87622 |
| KLHL20    | 0.0410508   | 2.86518 |
| SLC26A7   | 0.00128212  | 2.85855 |
| SFRP4     | 0.044028    | 2.84901 |
| HS.57079  | 0.000666251 | 2.82035 |

|           |             |         |
|-----------|-------------|---------|
| PLEKHG4B  | 0.0192389   | 2.81059 |
| C6ORF59   | 0.0286393   | 2.79445 |
| CARS      | 0.00742781  | 2.7731  |
| ACPL2     | 0.0437612   | 2.76351 |
| TLE6      | 0.000177263 | 2.76314 |
| TRPM8     | 0.0173793   | 2.74557 |
| HS.561493 | 0.0376267   | 2.73956 |
| TP53INP1  | 0.00642946  | 2.73067 |
| ZBTB4     | 0.0216213   | 2.72792 |
| NRIP1     | 0.0163558   | 2.70875 |
| HS.143018 | 0.00410079  | 2.68187 |
| MC1R      | 0.000752345 | 2.66438 |
| EFTUD2    | 0.0434009   | 2.65455 |
| APBB3     | 0.0305292   | 2.65094 |
| HS.568945 | 0.000881213 | 2.63661 |
| ATG4A     | 0.0193152   | 2.62232 |
| NCOR2     | 0.00496434  | 2.62135 |
| GDPD2     | 0.0300711   | 2.61565 |
| TRIM69    | 0.00913029  | 2.60935 |
| DDIT3     | 0.018403    | 2.60848 |
| ITGA7     | 0.0106187   | 2.58169 |
| HS.128848 | 0.000250453 | 2.57553 |
| BEX1      | 0.0290618   | 2.57518 |
| C19ORF18  | 0.00526613  | 2.56777 |
| DIP2C     | 0.0199542   | 2.55622 |
| ONECUT2   | 0.0160906   | 2.54887 |

|           |             |         |
|-----------|-------------|---------|
| GAL3ST4   | 0.0417959   | 2.53507 |
| NADK      | 0.000218624 | 2.50769 |
| LOC643505 | 0.000681809 | 2.49738 |
| TMEM63A   | 0.0252175   | 2.49192 |
| MMP15     | 0.0129372   | 2.4916  |
| TMEM49    | 0.0251359   | 2.48543 |
| HS.428370 | 0.0256186   | 2.48514 |
| OSMR      | 0.036623    | 2.47695 |
| LOC728014 | 0.0261817   | 2.47552 |
| CLSTN2    | 0.0028795   | 2.47389 |
| LYST      | 0.00759608  | 2.47036 |
| LOC728734 | 0.00974408  | 2.45957 |
| LONRF2    | 0.0143029   | 2.44842 |
| KIAA0913  | 0.0204276   | 2.44407 |
| APEG1     | 0.00543285  | 2.42563 |
| ZMAT3     | 0.0451844   | 2.41953 |
| SGSM2     | 0.00895869  | 2.41906 |
| C10ORF6   | 0.00674383  | 2.40176 |
| HS.527515 | 0.00681668  | 2.36744 |
| FAM135A   | 0.00248996  | 2.33678 |
| LASS5     | 2.38E-06    | 2.32689 |
| FTH1      | 0.0397671   | 2.3223  |
| WDR91     | 3.05E-05    | 2.32032 |
| ZAK       | 0.024697    | 2.31703 |
| PIK4CA    | 0.0177557   | 2.31338 |
| ZNFX1     | 0.0443597   | 2.30116 |

|              |            |         |
|--------------|------------|---------|
| PPP1R1B      | 0.0454921  | 2.29264 |
| PKD1         | 0.0112812  | 2.29168 |
| POLN         | 0.00294993 | 2.28682 |
| RP5-1022P6.2 | 0.0117891  | 2.28091 |
| MAMDC4       | 0.0125222  | 2.26472 |
| MAGI2        | 0.0108476  | 2.25771 |
| CLEC16A      | 0.00673328 | 2.25179 |
| AMDHD2       | 0.0380019  | 2.25097 |
| SUSD1        | 0.0358071  | 2.24755 |
| HS.544679    | 0.0176384  | 2.24717 |
| HKDC1        | 0.0166725  | 2.24627 |
| CCDC106      | 0.00648363 | 2.24616 |
| C12ORF5      | 0.0220172  | 2.24585 |
| LOC220686    | 0.0317608  | 2.23491 |
| ARFGEF1      | 0.00246669 | 2.22167 |
| BICD1        | 0.0150916  | 2.21672 |
| HS.537004    | 0.0463057  | 2.21233 |
| GALIG        | 0.0234082  | 2.21222 |
| CIC          | 0.00666413 | 2.19937 |
| LRSAM1       | 0.00403892 | 2.19274 |
| CASP6        | 0.0122341  | 2.18266 |
| PPP1R10      | 0.00342833 | 2.17558 |
| REPS1        | 0.00301183 | 2.16739 |
| HS.559714    | 0.0136504  | 2.16721 |
| RCVRN        | 0.00208787 | 2.16711 |
| AGXT2L2      | 0.00218453 | 2.16603 |

|           |             |         |
|-----------|-------------|---------|
| ASCC2     | 0.000568475 | 2.15466 |
| ALDH3A2   | 0.00176812  | 2.14549 |
| LRRC16    | 0.00870684  | 2.13321 |
| DAPK1     | 0.0411145   | 2.13013 |
| ZNF621    | 0.00906444  | 2.1203  |
| CRYGS     | 0.0256537   | 2.11273 |
| SPON2     | 0.0303035   | 2.10429 |
| ITPRIP    | 0.047244    | 2.10334 |
| DCHS1     | 0.0335573   | 2.10281 |
| HS.545585 | 0.00013175  | 2.09977 |
| LOC654127 | 0.0166428   | 2.09954 |
| LGALS12   | 1.29E-05    | 2.09573 |
| PLCL4     | 0.0237848   | 2.09265 |
| RERE      | 0.0149306   | 2.09014 |
| WDR1      | 0.0270752   | 2.08829 |
| CLDN15    | 0.000589847 | 2.08431 |
| LOC390414 | 0.0232115   | 2.08241 |
| PCSK7     | 0.00579137  | 2.08214 |
| HS.56147  | 0.0139497   | 2.08205 |
| RICS      | 0.0421931   | 2.08072 |
| TSC22D2   | 0.0224498   | 2.07393 |
| FLJ23834  | 0.0459375   | 2.07165 |
| PIP4K2C   | 0.0132001   | 2.06933 |
| NAGLU     | 0.0167181   | 2.06834 |
| LRFN2     | 0.0369177   | 2.06361 |
| AMY2A     | 0.0178938   | 2.06206 |

|           |             |          |
|-----------|-------------|----------|
| GLCCI1    | 0.0151999   | 2.06042  |
| NADSYN1   | 0.0173195   | 2.04903  |
| LCN9      | 0.000380098 | 2.04277  |
| LOC652683 | 0.0222052   | 2.03955  |
| SPTBN1    | 0.0160115   | 2.03883  |
| MYO7A     | 2.10E-06    | 2.03406  |
| PHLDB1    | 0.0145381   | 2.03376  |
| LOC645850 | 0.00043253  | 2.03281  |
| CYP21A2   | 0.0158794   | 2.02057  |
| SPATA5L1  | 0.0326649   | 2.01361  |
| PIP5K1C   | 0.0465276   | 2.01278  |
| ZMIZ2     | 5.02E-05    | 2.00972  |
| MARK3     | 0.00496026  | 2.00348  |
| SNX19     | 0.000282863 | 2.00025  |
| GPR63     | 0.00477863  | -2.00468 |
| C9ORF6    | 0.000259007 | -2.00517 |
| ZNF334    | 0.00910053  | -2.00553 |
| LRP11     | 0.0195786   | -2.00587 |
| STRBP     | 0.0435147   | -2.01121 |
| MVK       | 0.035556    | -2.01461 |
| PCDHB15   | 0.0226923   | -2.01521 |
| RALB      | 0.0416407   | -2.01779 |
| RAD9A     | 0.00249043  | -2.02047 |
| FAM171A1  | 0.0182405   | -2.02396 |
| TMEM177   | 0.0230446   | -2.02458 |
| TAF5      | 0.0167786   | -2.02558 |

|           |             |          |
|-----------|-------------|----------|
| C10ORF82  | 0.00852192  | -2.0373  |
| SLC25A15  | 0.0223218   | -2.03895 |
| WDR57     | 0.0327061   | -2.04156 |
| LOC389203 | 0.0153534   | -2.0452  |
| LOC645058 | 0.0152089   | -2.04682 |
| FH        | 0.000154896 | -2.049   |
| PGRMC1    | 0.00622909  | -2.04923 |
| NUP107    | 0.00241149  | -2.05406 |
| ZBBX      | 0.000139674 | -2.05603 |
| PPIH      | 0.0125612   | -2.05729 |
| TRAF3     | 0.00351316  | -2.06144 |
| NINL      | 0.0167797   | -2.06221 |
| MTL5      | 0.00262937  | -2.06285 |
| AS3MT     | 0.000756715 | -2.0647  |
| TSP50     | 0.00012005  | -2.06683 |
| SYTL3     | 0.000453441 | -2.06714 |
| FBXO5     | 0.00817723  | -2.06764 |
| RBKS      | 0.00240036  | -2.06771 |
| STARD4    | 0.000354677 | -2.07487 |
| C10ORF57  | 0.0178486   | -2.07513 |
| SNRPB     | 0.0370499   | -2.07514 |
| C20ORF45  | 0.00870194  | -2.07926 |
| LIG1      | 0.0382464   | -2.07956 |
| LOC647954 | 0.0282156   | -2.08437 |
| WNT4      | 0.0144552   | -2.08871 |
| CDCA1     | 0.0329966   | -2.09075 |

|           |             |          |
|-----------|-------------|----------|
| SMC2      | 0.040336    | -2.09401 |
| MORN5     | 5.93E-05    | -2.09466 |
| PSMC3IP   | 0.00579392  | -2.10082 |
| HSP90AB1  | 0.00206747  | -2.10287 |
| CRYGD     | 0.00130263  | -2.11195 |
| POLR2D    | 0.0330364   | -2.11604 |
| GOLPH3L   | 0.0027028   | -2.11612 |
| C1ORF229  | 0.00261418  | -2.11889 |
| WDR63     | 0.000553305 | -2.1225  |
| C7ORF68   | 0.0245749   | -2.12768 |
| MAOB      | 0.000282718 | -2.128   |
| LOC401152 | 0.00311447  | -2.12877 |
| CD164L2   | 0.00134933  | -2.13426 |
| SNRPF     | 0.0298721   | -2.14228 |
| HS.405877 | 0.00497919  | -2.14336 |
| CETN3     | 0.0152146   | -2.15264 |
| C13ORF30  | 3.76E-05    | -2.15691 |
| STAC      | 0.0392267   | -2.19172 |
| LOC143543 | 0.00440688  | -2.19494 |
| FANCD2    | 0.018547    | -2.20114 |
| PRKCABP   | 0.0246781   | -2.2013  |
| ARHGEF16  | 0.0211485   | -2.20212 |
| LRRIQ1    | 0.000379891 | -2.20383 |
| NOS3      | 0.0332881   | -2.2095  |
| KHDC1     | 0.0289325   | -2.21929 |
| HS.532698 | 0.032643    | -2.22949 |



|           |             |          |
|-----------|-------------|----------|
| NUF2      | 0.00580439  | -2.23297 |
| AMMECR1   | 0.0295579   | -2.23382 |
| LSAMP     | 0.0318628   | -2.24044 |
| RTN4RL1   | 0.000323588 | -2.24398 |
| LOC646849 | 0.0379897   | -2.25314 |
| C1ORF218  | 0.0410531   | -2.26215 |
| CGB1      | 1.03E-09    | -2.26443 |
| BET1      | 0.00261394  | -2.27836 |
| NARS2     | 0.00203171  | -2.27984 |
| C9ORF40   | 0.0140613   | -2.28827 |
| SLFN12    | 0.0499795   | -2.29989 |
| ABCB4     | 0.00761486  | -2.30075 |
| CBLB      | 0.00716789  | -2.30647 |
| PKP4      | 0.0339337   | -2.31162 |
| CACNA1A   | 0.00074258  | -2.31822 |
| RFC4      | 0.0149179   | -2.34367 |
| HSD11B2   | 0.0386784   | -2.35105 |
| ARMCX2    | 0.000336769 | -2.3694  |
| GGH       | 0.0138206   | -2.3705  |
| LOC284023 | 0.0380921   | -2.37302 |
| LYL1      | 9.91E-05    | -2.37825 |
| ACBD7     | 0.0456511   | -2.38119 |
| HRASLS    | 0.0359031   | -2.40019 |
| ZCCHC3    | 0.0277919   | -2.40279 |
| NIF3L1    | 0.00231975  | -2.42182 |
| LOC650826 | 0.0224812   | -2.42618 |

|           |            |          |
|-----------|------------|----------|
| HAUS4     | 0.0256362  | -2.44508 |
| LOC440160 | 0.00680354 | -2.44561 |
| NXT2      | 0.00654227 | -2.45065 |
| C18ORF54  | 0.00585985 | -2.45595 |
| CXXC4     | 0.0488544  | -2.46335 |
| TMEM216   | 0.0371462  | -2.4706  |
| FADS1     | 0.0227982  | -2.47447 |
| CSRP2     | 0.0315696  | -2.47972 |
| LRRC8C    | 0.00468211 | -2.47991 |
| N6AMT2    | 0.00573743 | -2.48533 |
| UGDH      | 0.00952016 | -2.51027 |
| RACGAP1   | 0.0120911  | -2.51233 |
| PRIM1     | 0.0274539  | -2.51253 |
| SYT9      | 0.0184347  | -2.51446 |
| OPLAH     | 0.0189339  | -2.5407  |
| ANLN      | 0.0202664  | -2.56555 |
| CCDC58    | 0.00116803 | -2.5739  |
| CABYR     | 0.00369168 | -2.57897 |
| BCL2      | 0.0115373  | -2.58304 |
| CHAF1B    | 0.0452558  | -2.62423 |
| KIF18A    | 0.0020093  | -2.62974 |
| RFC5      | 1.68E-05   | -2.64811 |
| CETN2     | 0.0360394  | -2.65761 |
| LOC643287 | 0.0229567  | -2.67447 |
| CDC7      | 0.00936239 | -2.68467 |
| LOC728037 | 0.0309837  | -2.70808 |

|           |            |          |
|-----------|------------|----------|
| FAM127B   | 0.0145423  | -2.73266 |
| NDC80     | 0.0202288  | -2.73291 |
| ZIC1      | 0.0476825  | -2.75171 |
| NAALAD2   | 0.0202629  | -2.75431 |
| TUB       | 0.0462136  | -2.76739 |
| FANCI     | 0.0143767  | -2.77452 |
| CDC25A    | 0.0223721  | -2.79217 |
| C6ORF192  | 0.00556864 | -2.82535 |
| YEATS4    | 0.0249814  | -2.82593 |
| HS.567759 | 0.0190882  | -2.85648 |
| LRRN1     | 0.0466564  | -2.86761 |
| JAZF1     | 0.0259153  | -2.89297 |
| RPA3      | 0.0265949  | -2.89828 |
| NMRAL1    | 0.0445946  | -2.91269 |
| RNASEH2A  | 0.037893   | -2.92394 |
| CCNF      | 0.0488725  | -2.92896 |
| PCDH7     | 0.0170357  | -2.92914 |
| NDUFAF2   | 0.00114508 | -2.93137 |
| NUDT16    | 0.00090441 | -2.94056 |
| MND1      | 0.0111421  | -2.97444 |
| CHCHD6    | 4.55E-05   | -2.98045 |
| KIF11     | 0.04385    | -3.03506 |
| CDCA4     | 0.0353895  | -3.05    |
| DTL       | 0.0318987  | -3.05245 |
| ARL9      | 0.0443322  | -3.09314 |
| RAB11FIP4 | 0.0416076  | -3.10343 |

|          |             |          |
|----------|-------------|----------|
| PPAPDC3  | 0.00351671  | -3.17622 |
| TRIP13   | 0.0193468   | -3.2313  |
| CKAP2L   | 0.0458458   | -3.23209 |
| PPCS     | 0.0134703   | -3.24027 |
| PLIN2    | 0.00448052  | -3.2568  |
| C10ORF33 | 0.00778891  | -3.25874 |
| FDPS     | 0.000997701 | -3.31246 |
| RNASET2  | 0.00427521  | -3.34289 |
| KIF14    | 0.00255372  | -3.35572 |
| FZD9     | 0.0355917   | -3.36038 |
| UBE2T    | 0.0400664   | -3.36567 |
| CEP55    | 0.0249437   | -3.42559 |
| AHCY     | 0.0176768   | -3.49037 |
| UCP2     | 0.0115392   | -3.53425 |
| SCD      | 0.00699781  | -3.54424 |
| CENPN    | 0.0404844   | -3.55355 |
| IDI1     | 0.00170882  | -3.5804  |
| BIRC5    | 0.0490989   | -3.63415 |
| STAMBPL1 | 0.031645    | -3.63622 |
| FGFBP3   | 0.0416794   | -3.64257 |
| PHF11    | 0.0136003   | -3.72949 |
| OIP5     | 0.0242146   | -3.73391 |
| GINS2    | 0.0329271   | -3.7496  |
| APOC1    | 0.0272935   | -3.75591 |
| CENPA    | 0.00774439  | -3.77898 |
| ECT2     | 0.0164654   | -3.80785 |

|           |             |          |
|-----------|-------------|----------|
| CNTN3     | 0.000331434 | -3.8173  |
| MELK      | 0.0407946   | -3.82097 |
| TYMS      | 0.0234463   | -3.83665 |
| ACAT2     | 0.00367761  | -4.08583 |
| DHCR24    | 0.000423426 | -4.22154 |
| NECAB2    | 0.0120314   | -4.4167  |
| CDCA8     | 0.0113126   | -4.42129 |
| RAD51AP1  | 0.00733908  | -4.42835 |
| FAM64A    | 0.0156121   | -4.45508 |
| HS.348844 | 0.0100661   | -4.46926 |
| CLDN11    | 0.0276058   | -4.50741 |
| SLC7A3    | 0.046768    | -4.63481 |
| ATIC      | 0.00236895  | -4.68341 |
| CDCA3     | 0.0203969   | -4.72123 |
| OPCML     | 0.0409118   | -4.81216 |
| FAM83D    | 0.00951948  | -4.82407 |
| H1FO      | 0.0490925   | -4.8506  |
| C6ORF173  | 0.0015      | -4.99378 |
| PNMA3     | 0.0254097   | -5.2363  |
| TOP2A     | 0.00681087  | -5.4769  |
| ODZ3      | 0.0138854   | -5.72791 |
| NR4A2     | 0.00239686  | -7.33225 |
| GALC      | 6.63E-06    | -7.70992 |
| GPX7      | 0.000413522 | -8.45588 |
| SH3GL3    | 0.0243212   | -8.83361 |
| RPRM      | 0.0219549   | -9.70285 |

|      |            |          |
|------|------------|----------|
| LPL  | 0.0317454  | -10.0544 |
| RBP1 | 0.00121436 | -11.0637 |

### Supplementary references

- 1 Park, I.H. *et al.*, Disease-specific induced pluripotent stem cells. *Cell* **134**, 877-886 (2008).
- 2 Barberi, T. *et al.*, Neural subtype specification of fertilization and nuclear transfer embryonic stem cells and application in parkinsonian mice. *Nat Biotechnol* **21**, 1200-1207 (2003).
- 3 Perrier, A.L. *et al.*, Derivation of midbrain dopamine neurons from human embryonic stem cells. *Proc Natl Acad Sci U S A* **101**, 12543-12548 (2004).
- 4 Somers, A. *et al.*, Generation of transgene-free lung-disease specific human iPS cells using a single excisable lentiviral stem cell cassette. *Stem Cells* **28**, 1728-1740 (2010).
- 5 Mostoslavsky, G., Fabian, A.J., Rooney, S., Alt, F.W., & Mulligan, R.C., Complete correction of murine Artemis immunodeficiency by lentiviral vector-mediated gene transfer. *Proc Natl Acad Sci U S A* **103**, 16406-16411 (2006).
- 6 Li, H. & Durbin, R., Fast and accurate short read alignment with Burrows-Wheeler transform. *Bioinformatics* **25**, 1754-1760 (2009).
- 7 McKenna, A. *et al.*, The Genome Analysis Toolkit: a MapReduce framework for analyzing next-generation DNA sequencing data. *Genome Res* **20**, 1297-1303.
- 8 Li, H. *et al.*, The Sequence Alignment/Map format and SAMtools. *Bioinformatics* **25**, 2078-2079 (2009).
- 9 Ying, S.W. & Goldstein, P.A., Propofol-block of SK channels in reticular thalamic neurons enhances GABAergic inhibition in relay neurons. *J Neurophysiol* **93**, 1935-1948 (2005).
- 10 Ying, S.W. *et al.*, Dendritic HCN2 channels constrain glutamate-driven excitability in reticular thalamic neurons. *J Neurosci* **27**, 8719-8732 (2007).
- 11 Park, I.H. *et al.*, Reprogramming of human somatic cells to pluripotency with defined factors. *Nature* **451**, 141-146 (2008).
- 12 Yang, K. *et al.*, Human TLR-7-, -8-, and -9-mediated induction of IFN-alpha/beta and -lambda is IRAK-4 dependent and redundant for protective immunity to viruses. *Immunity* **23**, 465-478 (2005).
- 13 Lee, G. *et al.*, Modelling pathogenesis and treatment of familial dysautonomia using patient-specific iPSCs. *Nature* **461**, 402-406 (2009).
- 14 Sommer, C.A. *et al.*, Induced pluripotent stem cell generation using a single lentiviral stem cell cassette. *Stem Cells* **27**, 543-549 (2009).
- 15 Sommer, C.A. *et al.*, Excision of Reprogramming Transgenes Improves the Differentiation Potential of iPS Cells Generated with a Single Excisable Vector. *Stem Cells* **28**, 64-74 (2009).
- 16 Staerk, J. *et al.*, Reprogramming of Human Peripheral Blood Cells to Induced Pluripotent Stem Cells. *Cell Stem Cell* **7**, 20-24 (2010).
- 17 Park, I.H., Lerou, P.H., Zhao, R., Huo, H., & Daley, G.Q., Generation of human-induced pluripotent stem cells. *Nat Protoc* **3**, 1180-1186 (2008).
